# Supplementary material
Source: PubMed Central journal article supplement (PMC6463241)
Supplement: nl9b00508_si_001.pdf [file nl9b00508_si_001.pdf]

# 124-color super-resolution imaging by engineering DNA-PAINT blinking kinetics

Orsolya K. Wade<sup>1,2,5</sup>, Johannes B. Woehrstein<sup>1,2,5</sup>, Philipp C. Nickels<sup>1,2,5</sup>, Sebastian Strauss<sup>1,2,5</sup>, Florian Stehr<sup>2</sup>, Johannes Stein<sup>2</sup>, Florian Schueder<sup>1,2</sup>, Maximilian T. Strauss<sup>1,2</sup>, Mahipal Ganji<sup>1,2</sup>, Joerg Schnitzbauer<sup>1,2</sup>, Heinrich Grabmayr<sup>1,2</sup>, Peng Yin<sup>3,4</sup>, Petra Schwille<sup>2</sup> & Ralf Jungmann<sup>1,2</sup>

<sup>1</sup>Department of Physics and Center for Nanoscience, Ludwig Maximilian University, 80539 Munich, Germany, <sup>2</sup>Max Planck Institute of Biochemistry, 82152 Martinsried near Munich, Germany, <sup>3</sup>Wyss Institute for Biologically Inspired Engineering, Harvard University, Boston, Massachusetts, USA, <sup>4</sup>Department of Systems Biology, Harvard Medical School, Boston, Massachusetts, USA. <sup>5</sup>These authors contributed equally to this work.

|                                 |                                                                                   |
|---------------------------------|-----------------------------------------------------------------------------------|
| <b>Supplementary Methods</b>    |                                                                                   |
| <b>Supplementary Figure 1</b>   | <b>Cluster detection in simulated data</b>                                        |
| <b>Supplementary Figure 2</b>   | <b>DNA origami designs for binding duration and frequency modulation</b>          |
| <b>Supplementary Figure 3</b>   | <b>Filtering DNA origami data prior to clustering</b>                             |
| <b>Supplementary Figure 4</b>   | <b>DNA-PAINT images of DNA origami before and after filtering</b>                 |
| <b>Supplementary Figure 5</b>   | <b>Cluster detection in DNA origami data</b>                                      |
| <b>Supplementary Figure 6</b>   | <b>DNA origami data before and after cluster identification</b>                   |
| <b>Supplementary Figure 7</b>   | <b>Clustering results for four-corner DNA origami</b>                             |
| <b>Supplementary Figure 8</b>   | <b>Four-corner DNA origami structures before and after cluster identification</b> |
| <b>Supplementary Figure 9</b>   | <b>Agarose gels of the 124 individual DNA origami structures</b>                  |
| <b>Supplementary Table 1</b>    | <b>DNA-PAINT imager strands</b>                                                   |
| <b>Supplementary Table 2</b>    | <b>Core staple strands for rectangular DNA origami</b>                            |
| <b>Supplementary Table 3</b>    | <b>Biotinylated staple strands</b>                                                |
| <b>Supplementary Table 4</b>    | <b>Modified staple strands for DNA origami</b>                                    |
| <b>Supplementary Table 5</b>    | <b>List of DNA-PAINT handles</b>                                                  |
| <b>Supplementary Table 6</b>    | <b>RNA-FISH probe set targeting MKI67 mRNA variant 2</b>                          |
| <b>Supplementary Table 7</b>    | <b>RNA-FISH probe set targeting TFRC mRNA variant 4</b>                           |
| <b>Supplementary Table 8</b>    | <b>Docking sites conjugated to secondary antibodies</b>                           |
| <b>Supplementary Table 9</b>    | <b>Staple strands used for 124 color DNA origami structures</b>                   |
| <b>Supplementary Table 10</b>   | <b>Barcode IDs and combinations of frequencies to achieve 124 colors</b>          |
| <b>Supplementary Note 1</b>     | <b>Design of rectangular DNA origami</b>                                          |
| <b>Supplementary Note 2</b>     | <b>RNA-FISH probe design</b>                                                      |
| <b>Supplementary Note 3</b>     | <b>Sequences of MKI67 mRNA variant 2 used for probe design, 11427 bp</b>          |
| <b>Supplementary Note 4</b>     | <b>Sequences of TFRC mRNA variant 4 used for probe design, 4695 bp</b>            |
| <b>Supplementary References</b> |                                                                                   |

## Supplementary Methods

### Materials

Unmodified, dye-labeled, and biotinylated DNA oligonucleotides were purchased from MWG Eurofins or Integrated DNA Technologies. DNA scaffold strands were purchased from Tilibit (p7249, identical to M13mp18). Streptavidin was purchased from Thermo Fisher (cat: S-888). BSA-Biotin was obtained from Sigma-Aldrich (cat: A8549). Glass slides were ordered from Thermo Fisher (cat: 10756991) and coverslips were purchased from Marienfeld (cat: 0107032). Freeze 'N Squeeze columns were ordered from Bio-Rad (cat: 732-6165). PEG-8000 was purchased from Merck (cat: 6510-1KG). Tris 1M pH 8.0 (cat: AM9856), EDTA 0.5M pH 8.0 (cat: AM9261), Magnesium 1M (cat: AM9530G) and Sodium Chloride 5M (cat: AM9759) were ordered from Ambion. Ultrapure water (cat: 10977-035) was purchased from Thermo Fisher Scientific. Potassium chloride (cat: 6781.1) was ordered from Roth. Sodium hydroxide (cat: 31627.290) was purchased from VWR. Tween-20 (cat: P9416-50ML), Glycerol (cat: G5516-500ML) and Methanol (cat: 32213-2.5L) were ordered from Sigma-Aldrich. Protocatechuate 3,4-Dioxygenase *Pseudomonas* (PCD) (cat: P8279), 3,4-Dihydroxybenzoic acid (PCA) (cat: 37580-25G-F) and (+)-6-Hydroxy-2,5,7,8-tetra-methylchromane-2-carboxylic acid (Trolox) (cat: 238813-5G) were purchased from Sigma-Aldrich. SYBR Safe DNA gel stain was purchased from Invitrogen (cat: SS33102). HeLa cells were purchased from the Leibniz Institute DSMZ (cat: ACC-57). A549 cells were purchased from ATCC. Dulbecco's Modified Eagle medium (DMEM) with high glucose, GlutaMAX™ and sodium pyruvate (cat: 31966-021), Fetal Bovine Serum (FBS) (cat: 10500-064), 1× Phosphate Buffered Saline (PBS) pH 7.2 (cat: 20012-019), 10× PBS pH 7.4 (cat: 70011036), and 0.05% Trypsin-EDTA (cat: 25300-054) were purchased from Thermo Fisher Scientific. 16% (w/v) Paraformaldehyde (cat: 28906) was purchased from Thermo Fisher Scientific. Glutaraldehyde (cat: 16220) was obtained from Electron Microscopy Sciences. Bovine Serum Albumin (cat: A4503-10G) was ordered from Sigma-Aldrich. Penicillin-Streptomycin (cat: 15140-122) was ordered from Thermo Fisher Scientific. Triton X-100 (cat: 6683.1) was purchased from Roth. Glass-bottomed 8-well  $\mu$ -slides (cat: 80827) were obtained from ibidi. Primary polyclonal goat anti-CHC antibody (cat: sc-6579) was purchased from Santa Cruz Biotechnology. Primary monoclonal mouse anti-PMP70 antibody (cat: SAB4200181) was purchased from Sigma-Aldrich. Secondary polyclonal antibodies (cat: 705-005-147 and 715-005-150) were purchased from Jackson ImmunoResearch. Dextran sulfate 50% solution was purchased from Merck (cat: S4030). Sheared Salmon Sperm DNA (cat: AM9680), 10× PBS (cat: AM9624), 20× SSC (cat: AM9763), Hi-Di Formamide (cat: 4440753), yeast tRNA (cat: 15401011), and UltraPure BSA (cat: AM2616) was purchased from Thermo Fisher Scientific. Ribonucleoside Vanadyl Complex (VRC) (cat: S1402S) and RNase Inhibitor, Murine (cat: M0314S) were purchased from New England Biolabs.

### Buffers

**Origami buffers.** Four buffers were used for DNA origami sample preparation and imaging: Folding Buffer (10 mM Tris, 10 mM EDTA, 12.5 mM MgCl<sub>2</sub>, pH 8); Buffer A (10 mM Tris-HCl pH 7.5, 100 mM NaCl, 0.05 % Tween 20, pH 7.5); Buffer B (5 mM Tris-HCl pH 8, 10 mM MgCl<sub>2</sub>, 1 mM EDTA, 0.05 % Tween 20, pH 8); Origami imaging buffer (same as B, but supplemented with 1× PCA, 1× PCD, and 1× Trolox). 100× Trolox: 100 mg Trolox, 430  $\mu$ L 100 % Methanol, 345  $\mu$ L 1M NaOH in 3.2 ml H<sub>2</sub>O. 40× PCA: 154 mg PCA, 10 ml water and NaOH were mixed and pH was adjusted 9.0. 100× PCD: 9.3 mg PCD, 13.3 ml of buffer (100 mM Tris-HCl pH 8, 50 mM KCl, 1 mM EDTA, 50 % Glycerol). 2× PEG-Buffer was used for PEG precipitation (15 % PEG-8000, 500 mM NaCl in 1× TE buffer, pH 8.0). **RNA-FISH buffers:** Wash buffer: 10% formamide in 2× SSC; Hybridization buffer: 12.5 nM of working probe solution in 2xSSC, 10% formamide, 10% dextran sulfate, 0.1 mg/ml yeast tRNA, 0.1 mg/ml sheared salmon sperm DNA, 2 mM VRC, 0.10 mg/ml UltraPure BSA, RNase Inhibitor, Murine ~10U/ $\mu$ L. **Blocking buffer for Immunofluorescence:** 3% BSA, 0.1% Triton X-100 in PBS. **Cell imaging buffer:** (1× PBS pH 8, 500 mM NaCl, 1× PCA, 1× PCD, 1× Trolox).

### Stochastic binding simulations

DNA-PAINT blinking traces were simulated using the stochastic reaction simulation tool COPASI<sup>1</sup>. Simulations were carried out as described earlier<sup>2</sup>. In brief, we simulated structures displaying 40 binding sites of 8 nt length, or 40 sites of 10 nt length and structures displaying 120 sites of 8 nt or 120 sites of 10 nt length. All simulation parameters were experimentally obtained. For 8 nt and 10 nt binding sites, a mean binding duration of 0.4 s and 5 s was determined, respectively. With our current imaging buffer constitution, an association rate of  $2.9 \cdot 10^6$  (Ms)<sup>-1</sup> was used. Imager concentration was set to 80 pM, and the integration time to 30 ms with 1500 s total acquisition time. For each DNA origami design, 50 structures were simulated separately. The data from the four simulations were pooled, and clustered using the HDBSCAN algorithm, with 'min\_cluster\_size' set to 15, and 'min\_samples' set to 1. (**Supplementary Figure 1**).

### DNA origami design, assembly and purification

DNA origami structures were designed using the design module of Picasso<sup>3</sup>. Folding of structures was performed using the following components: p7249 M13 single-stranded DNA scaffold (0.01  $\mu$ M), core staples (0.5  $\mu$ M), biotin staples (0.5  $\mu$ M), modified staples (each 0.5  $\mu$ M), 1× folding buffer in a total of 20  $\mu$ l for each sample. Annealing was done by cooling the mixture from 65 °C to 25 °C in 2 hours in a thermocycler. Structures were purified either using PEG-precipitation<sup>4</sup> (40 versus 120 binding sites and 4 corner origami), or by running the samples on a 1.5% agarose gel (1.5% agarose, 0.5× TA buffer, 12.5 mM MgCl<sub>2</sub>, 1× SYBR Safe), cutting out bands containing the folded structures and purifying them using Freeze 'N Squeeze Columns (spun for 5 min at 1,000 ×g) (124 color imaging) (**Supplementary Figure 9**).

### Cell culture

HeLa cells were used for CHC and PMP70 imaging. For RNA-FISH experiments A-549 cells were used. All cells were grown in high glucose (4.5 g/l) DMEM supplemented with GlutaMAX™, 1 mM sodium pyruvate and 10% FBS. Cells were seeded into 8-well-chambered cover glasses and grown to approximately 70% confluency.

### Design of RNA- Fluorescence in situ Hybridization probes

RNA-FISH probes were designed against the mRNA sequence of the longest transcript variant of each gene (**Supplementary Notes 3 and 4**). FASTA sequences were taken from the NCBI Genome Browser. We used the Stellaris® Probe Designer version 4.2 with a masking level of 5 to get 40 probe strands for each target. These probes were then elongated on the 3'-end with DNA-PAINT handle sequences for DNA-PAINT imaging (**Supplementary Note 2**).

### Hybridization of RNA-FISH probes

Cell media was aspirated and cells were rinsed with 1× PBS. Cells were fixed with 4% formaldehyde in 1× PBS for 10 min at room temperature, then washed two times with 1× PBS and 4 mM VRC. Permeabilization was carried out with 70% (v/v) ethanol for 6 hours at 4 °C. Before hybridization, cells were incubated in wash buffer supplemented with 4 mM VRC for 10 minutes at room temperature. **Hybridization:** 300 µl of the hybridization solution containing 12.5 nM of probes was added to the cells. Hybridization was carried out in a sealed chamber at 37 °C for 16 hours. **Washing:** Chambers were rinsed once then washed twice for 30 min each at 37 °C in wash buffer.

### Antibody conjugation

Antibodies were conjugated to DNA-PAINT docking sites via maleimide-PEG2-succinimidyl ester chemistry<sup>3,5</sup> (see **Supplementary Table 8** for handle sequences).

### CHC and PMP70 Immunostaining

Cell medium was aspirated and cells were fixed with 3% paraformaldehyde, 0.1% glutaraldehyde, and 0.3% Triton X-100 in PBS for 10 min at room temperature, then washed three times with PBS. Free aldehyde groups were reduced using 1 mg/ml sodium borohydride in PBS for 7 min, followed by three washing steps with PBS for 5 min. Cells were blocked and permeabilized with blocking buffer for 90 min. Cells were stained with primary antibodies, anti-CHC goat and anti-PMP70 mouse (both diluted 1:100), in blocking buffer overnight at 4 °C. Cells were washed three times with PBS for 5 min. Cells were incubated with DNA-conjugated secondary antibodies (anti-goat-P12-8 nt and anti-mouse-P13-9 nt (**Supplementary Table 8**) diluted in blocking buffer (1:200) for 1 hour at room temperature before finally washing the cells three times in PBS for 5 min.

### Super-resolution microscope setups

**Custom TIRF Setup.** Fluorescence imaging was carried out on an inverted Nikon Eclipse Ti microscope (Nikon Instruments) with the Perfect Focus System, applying an objective-type TIRF configuration with an oil-immersion objective (Apo SR TIRF 100×, NA 1.49, Oil). Two lasers were used for excitation: 561 nm (200 mW, Coherent Sapphire) or 640 nm (150 mW, Toptica iBeam smart). The laser beam was passed through cleanup filters (ZET561/10 or ZET642/20, Chroma Technology) and coupled into the microscope objective using a beam splitter (ZT561rdc or ZT647rdc, Chroma Technology). Fluorescence light was spectrally filtered with an emission filter (ET600/50m and ET575lp or ET705/72m and ET665lp, Chroma Technology) and imaged on an electron-multiplying charge-coupled device (EMCCD) camera (Andor iXon Ultra 897) or sCMOS camera (Andor Zyla 4.2) without further magnification, resulting in an effective pixel size of 160 nm (EMCCD) or 130 nm (sCMOS after 2×2 binning). Our custom TIRF setup was used for Figures 1d and 2f (EMCCD). **Spinning Disk Confocal Setup:** DNA-PAINT imaging of RNA-FISH samples was performed using an Andor Dragonfly Spinning Disk Confocal system (Andor) based on an inverted Nikon Eclipse Ti2 microscope (Nikon Instruments) with the Perfect Focus System, using an oil immersion objective (Plan Apo 100×, NA 1.45, Oil). For excitation, a 561 nm laser (2 W, MPB) was used. The laser beam was passed through a beam conditioning unit (Andor Borealis) for reshaping the beam from a Gaussian profile to a flat top profile. Next, the beam was coupled into the Andor Dragonfly spinning disk unit, passed through the multi-pinhole disk with a pinhole size of 40 µm and from there coupled into the objective lens. Excitation and emission light was spectrally split using a beam splitter (CR-DFLY-DMQD-01). Fluorescence light was spectrally filtered with an emission filter (TR-DFLY-F600-050) and imaged on an sCMOS camera (Andor Zyla 4.2 PLUS) without further magnification, resulting in an effective pixel size of 130 nm (sCMOS after 2×2 binning). The field of view was 1024 × 1024 pixels which is equivalent to 133.12 µm × 133.12 µm when taking the pixel size into account. The disk speed was set to 6000 rpm and an excitation field stop of 13.3mm × 13.3mm was applied. The Spinning Disk Confocal setup was used to acquire the image in **Figure 2b**.

### Imaging conditions

**Figure 1d.** Imaging was carried out using an imager strand concentration of 75 pM (P3-Cy3B). 50,000 frames were acquired using the EMCCD camera at 30 ms integration time with the EM gain set to 300, the pre-amp gain set to 3, and the readout bandwidth set to 17 MHz. Laser power (@561 nm) was set to 2.5 mW (measured before the back focal plane (BFP) of the objective).

**Figure 1f.** Images were acquired with an imager strand concentration of 2 nM (P3-Cy3B imager). 150,000 frames were acquired using the EMCCD camera at 30 ms integration time with the EM gain set to 300, the pre-amp gain set to 3, and the readout bandwidth set to 17 MHz. Laser power (@561 nm) was set to 500 mW (measured at the back focal plane (BFP) of the objective).

**Figure 2b.** DNA-PAINT microscopy was carried out using 10 nM of P3-Cy3B in imaging buffer. 40,000 frames were acquired using the EMCCD camera at 200 ms integration time and a readout bandwidth of 540 MHz. Laser power (@560 nm) was set to 500 mW resulting in a power of 18.3 mW at the sample plane. This can be translated to an intensity of 103.27 W/cm<sup>2</sup> at the sample plane.

**Figure 2f.** DNA-PAINT imaging of protein samples was carried out using the following imager strands: P12-Cy3B (250 pM) and P13-Cy3B (50 pM) in imaging buffer. 80,000 frames were acquired using the EMCCD camera at 30 ms integration time with the EM gain set to 300, the pre-amp gain set to 3, and the readout mode to 17 MHz. Laser power (@561 nm) was set to 8 mW (measured before the back focal plane (BFP) of the objective).

**Figure 3c.** Imaging was carried out using the following imager strands: P1-Atto655 (20 nM), P2-Cy3B (20 nM) and P3- Atto488 (20 nM), in Buffer B. 15,000 frames were acquired using the EMCCD camera at 100 ms integration time with the EM gain set to 300, the pre-amp gain set to 3, and the readout mode to 17 MHz. Laser power was set to ~25 mW (@488 nm), ~30 mW (@561 nm), and ~30 mW (@642 nm, all measured before the back focal plane (BFP) of the objective).

For all imager strand sequences see **Supplementary Table 1**.

## Image analysis

Raw fluorescence data was subjected to spot-finding and subsequent super-resolution reconstruction using the ‘Picasso’ software package<sup>3</sup>.

### Analysis of DNA origami data

Automated structure selection: After super-resolution reconstruction, structures were automatically selected using Picasso’s ‘Pick similar’ function with the following settings: Pick radius: 320 nm; Standard deviation: 2.

Filtering: After automated selection, picked ‘spots’ were further processed in order to remove unspecific binding events from specific ones originating from DNA origami locations. To achieve this, we implemented a multi-step filtering procedure. First, in order to remove non-repetitive binding events (e.g. imager strands non-specifically adsorbing to the surface), we fitted the mean frame value of binding events (from all picked spots) throughout the whole image acquisition. The rationale behind this step is that repetitive, correct picks (i.e. containing DNA origami structures) will yield a mean frame value of roughly half the number of total frames in the acquisition (gaussian distributed), while non-repetitive events will in most cases not last throughout the whole image acquisition time frame, leading to a mean frame value that is outside this distribution. We chose the mean of the distribution and set a cut-off value at +/- two times the standard deviation for filtering. Next, to also filter out structures with a non-repetitive blinking behavior, but with most events occurring around the mean frame value, we plotted the standard deviation of the mean frame values and used a cut-off value of 2000, and all data below this threshold were disregarded. (see **Supplementary Figures 3 and 4** for results).

Cluster Analysis: After filtering, the data was analyzed using an HDBSCAN<sup>6</sup> clustering algorithm. ‘Min\_cluster\_size’ was set to 15, and ‘min\_samples’ was set to 1, in the case of the four origami species (**Supplementary Figure 5 and 6**), and to 20 and 3, respectively, in the case of the 4-corner origami structures (**Supplementary Figures 7 and 8**).

Barcode Identification of 124 origami structures: First, all structures from all three acquisition rounds were aligned. Every structure exhibits a distinct kinetic blinking information in each of the three channels. This information was extracted for each spectral channel. The distribution of the number of binding events in each channel shows four separated clusters (see **Figure 3b**). After assigning every picked structure to one of the clusters in each channel, barcodes were identified.

### Analysis of RNA-FISH data

Single mRNA species were manually selected using Picasso’s pick tool with a pick diameter of 520 nm. Kinetic information was extracted as for the DNA origami case. Localizations were linked allowing a gap size of 2 frames between localizations to obtain a list of single binding events. The total number of binding events calculated from each structure was plotted to obtain a histogram of binding frequencies.

### Analysis of protein data

Approximately 200 protein clusters were manually selected using Picasso’s pick tool with a pick diameter of 240 nm. Kinetic information was extracted as for the DNA origami case. Localizations were linked allowing a gap size of 15 frames between localizations to obtain a list of single binding events. A mean binding time (i.e. blinking duration) was calculated from all events per pick.

## Supplementary Figures

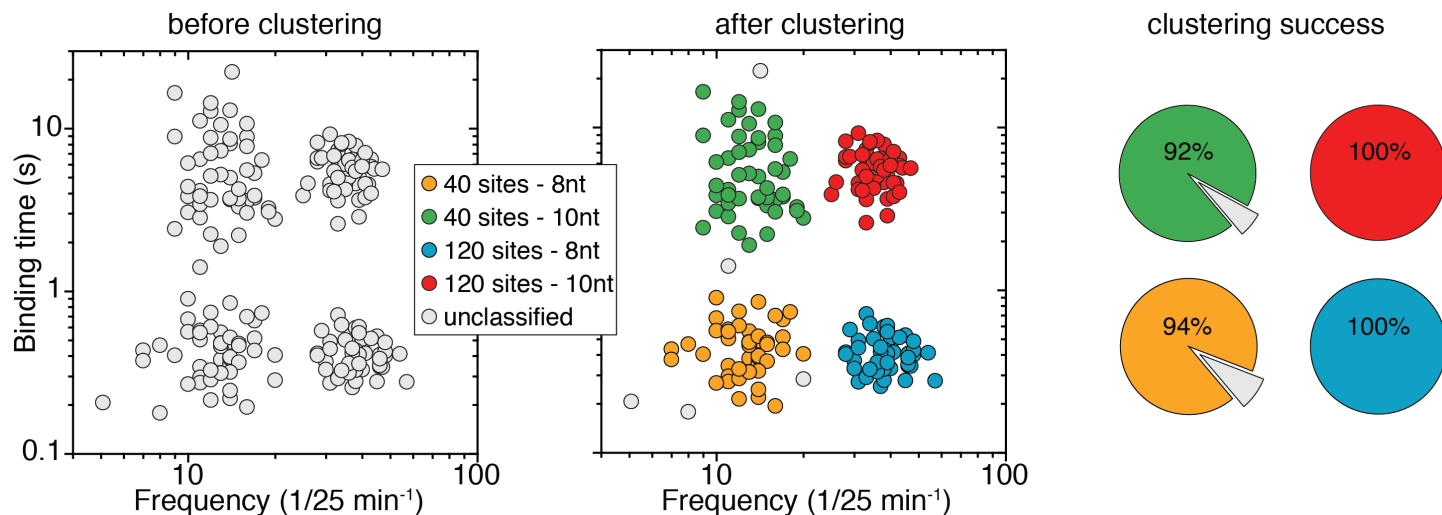

**Supplementary Figure 1 | Cluster detection in simulated data.** Data points from four individual stochastic binding simulations (for details see Online Methods) were clustered using HDBSCAN<sup>6</sup>. Data points plotted according to binding time and blinking frequency before clustering (**left**), and data plotted after clustering (**middle**). Individual colors were assigned to each of the resulting four populations. As each population was simulated individually, by comparing the results of the clustering algorithm to the original data, we were able to acquire the success rate of the clustering algorithm we used. The clustering resulted in a positive assignment rate of more than 92% in the case of all four populations (**right**).

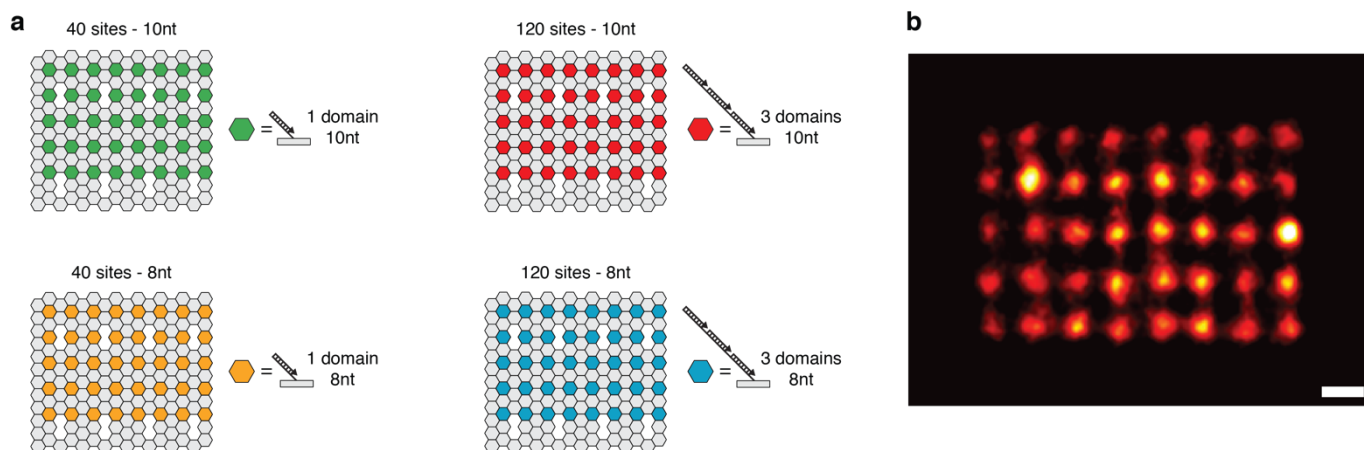

**Supplementary Figure 2 | DNA origami designs for binding duration and frequency modulation.** (a) Four DNA origami structures with different numbers and lengths of DNA-PAINT docking sites. Structures represented with green contain 40 binding domains of 10 nucleotide length each, while structures represented with yellow contain 40 binding sites, each 8 nucleotides long. Red and blue DNA origami structures were also modified at 40 positions, with each modification consisting of three sequential binding domains, resulting in a total of 120 binding sites on each structure. Red structures have 10 nucleotide long binding domains, while blue structures have 8 nucleotide long binding domains. (b) Super-resolved sum image of DNA origami clearly reveals the correct formation of the structures by showing all 40 binding sites, spaced 10 nm apart. Scale bar: 10 nm.

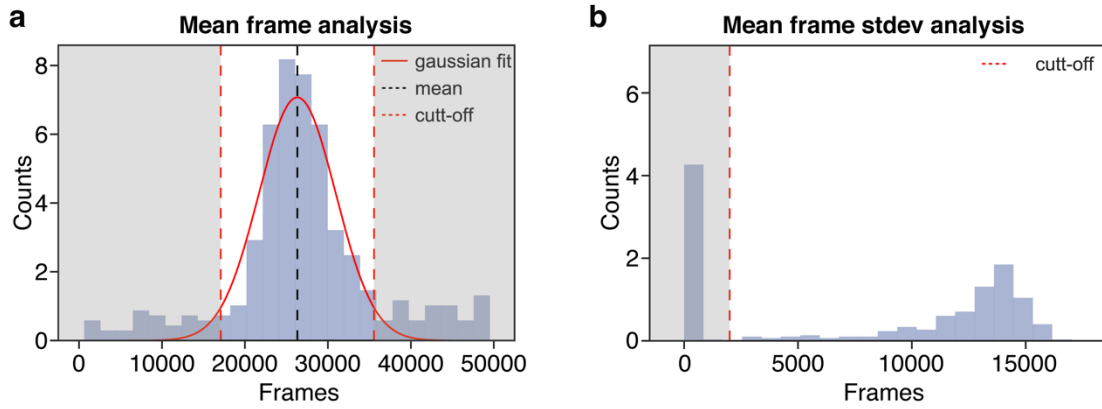

**Supplementary Figure 3 | Filtering DNA origami data prior to clustering.** (a) Resulting mean frame analysis (see Online Methods for description). Picks are rejected (gray) based on the following metric: More than  $2\times$  standard deviation of the mean. (b) For filtering of structures that show non-repetitive binding, however whose bindings are clustered around the mean frame, we plotted the standard deviation of the mean frame. Using a cut-off value of 2000 (red dashed line) all data below this threshold were disregarded (gray).

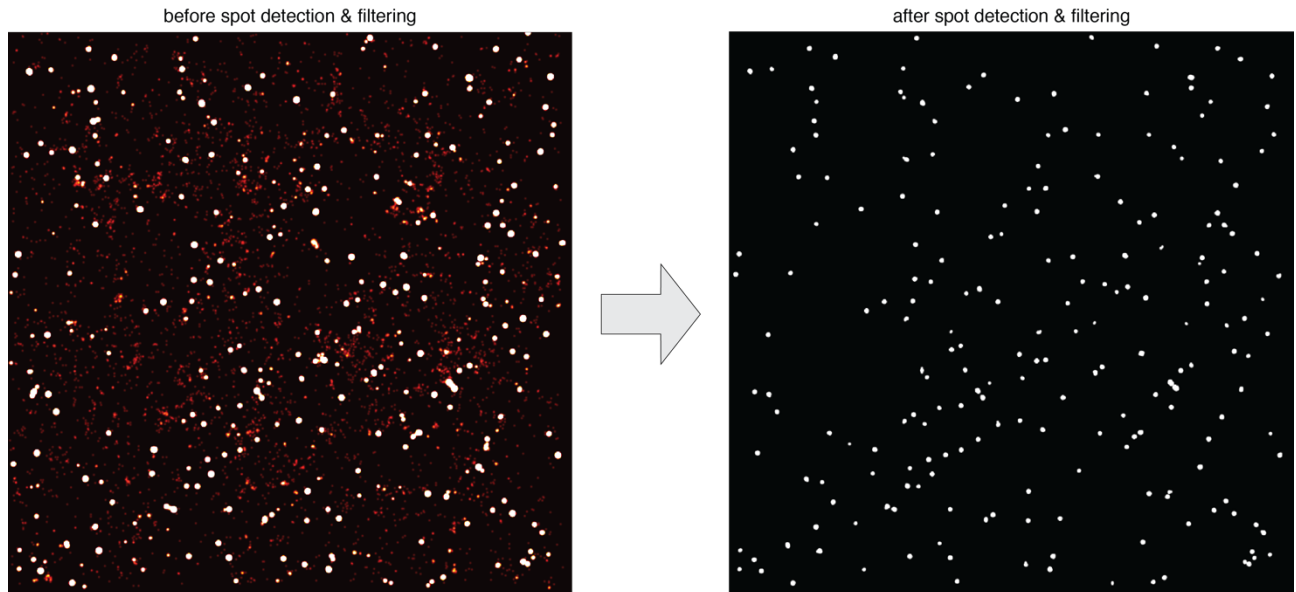

**Supplementary Figure 4 | DNA-PAINT images of DNA origami before and after filtering.** All initially identified localizations were rendered using Picasso Render, which was subsequently used for spot detection and picking of structures. **(left)**. We rendered the same dataset after we ran all localizations from the picked spots through our filtering system (**Supplementary Figure 3** and Online Methods). Background noise and unspecific blinking events are filtered out, and no longer appear in the newly rendered image **(right)**. Image size: 40.96  $\mu\text{m}$ .

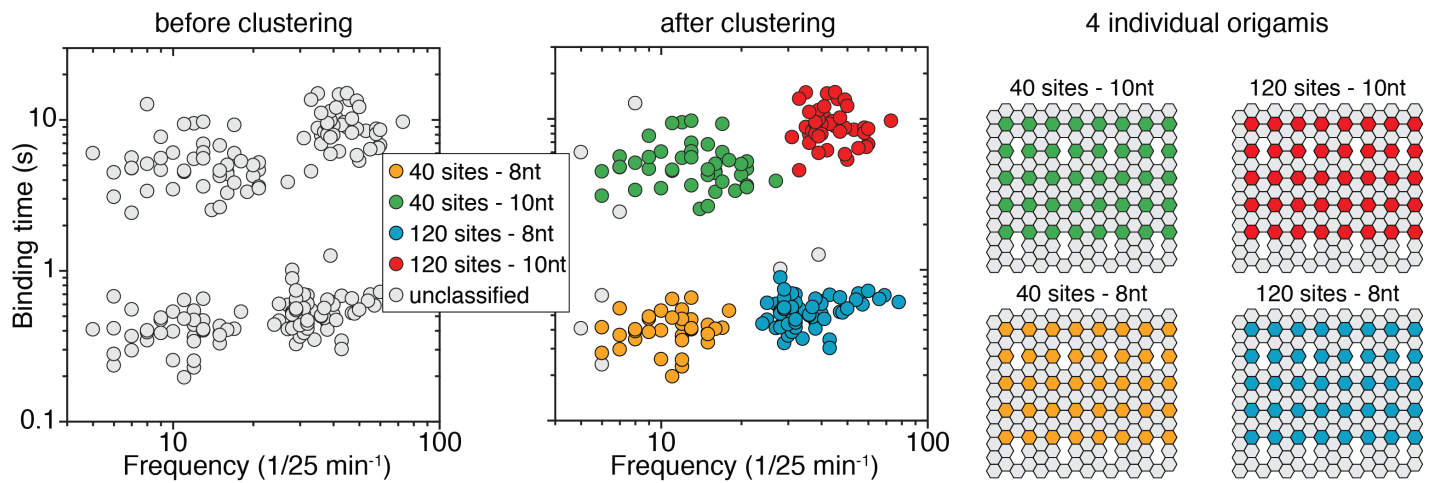

**Supplementary Figure 5 | Cluster detection in DNA origami data.** Data from measurements of four different DNA origami samples displaying 40 binding sites of 8 nt and 10 nt, and 120 binding sites of 8 nt and 10 nt long binding sites were acquired and plotted according to their blinking frequency and blinking duration **(left)**. Clustering the data using the HDBSCAN<sup>6</sup> algorithm resulted in four populations, to which we assigned distinct colors (green, yellow, red and blue). Using the assigned colors, we re-plotted each data point, in the color it was assigned. Grey dots indicate structures that could not be assigned to any of the four populations **(center)**. Green: 40 domains, 10 nt; Yellow: 40 domains, 8 nt; Red: 120 domains, 10 nt, Blue: 120 domains 8nt **(right)**.

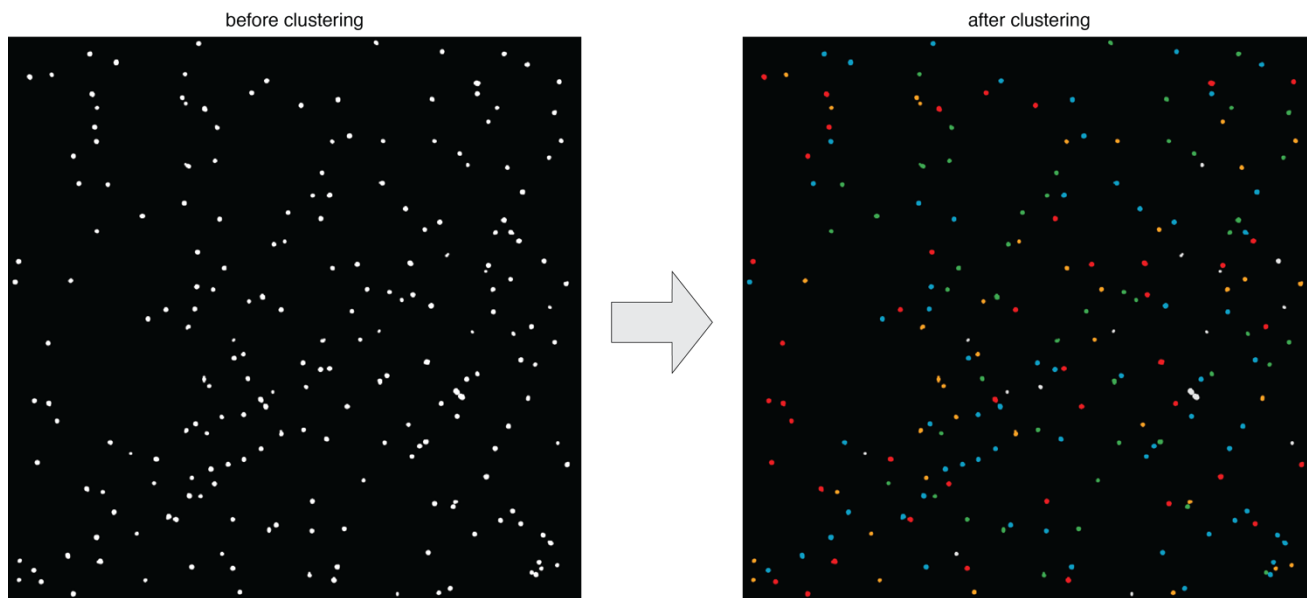

**Supplementary Figure 6 | DNA origami data before and after cluster identification.** After spot detection and filtering, all DNA origami structures (seen as white spots in the left image) were clustered according to their blinking behavior (**Supplementary Figure 5**) (left). We then re-rendered the image assigning a pseudo-color for each spot, according to the population it belonged to - green, yellow, red or blue (**right**). Image size: 40.96  $\mu\text{m}$ .

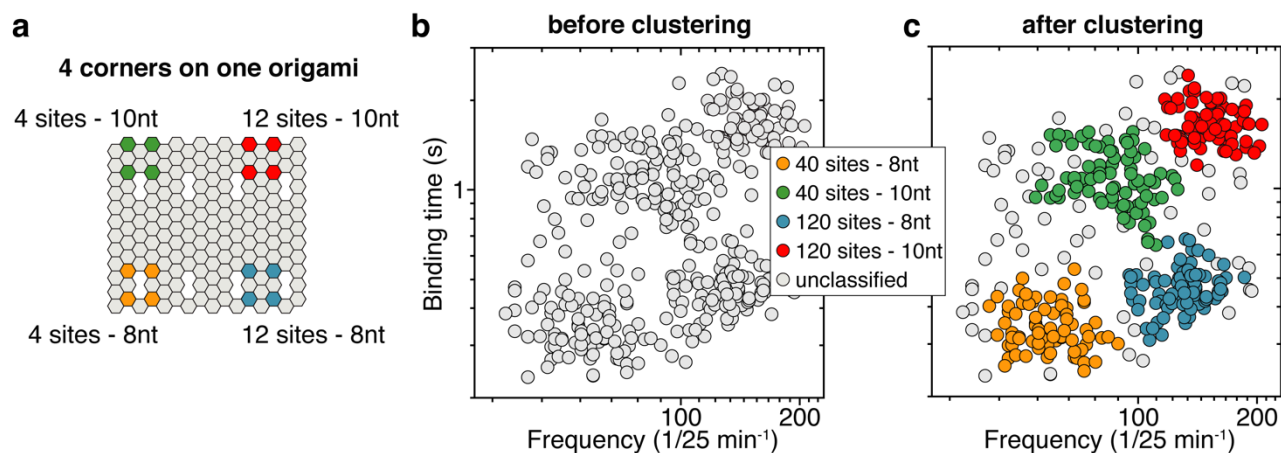

**Supplementary Figure 7 | Clustering results for four-corner DNA origami.** (a) We designed a DNA origami structure that contained all four previously used binding site designs, one in each corner. Four DNA origami staples were modified at each corner, resulting in the following designs: 4 single domains with a 10 nt binding site, (green), 4 single domains with an 8 nt binding site, 4 staples with  $4 \times 3$  (12) domains with 10nt binding sites (red), and 4 staples with  $4 \times 3$  (12) domains with 8 nt binding sites (blue). (b) These origami structures were imaged using DNA-PAINT, and the binding times and binding frequencies were plotted, after filtering, as in the case of the four separate origami species. (c) We then clustered the data using HDBSCAN and re-plotted them, marking the points with the color of the cluster they were assigned to. Grey dots were not assigned to any cluster.



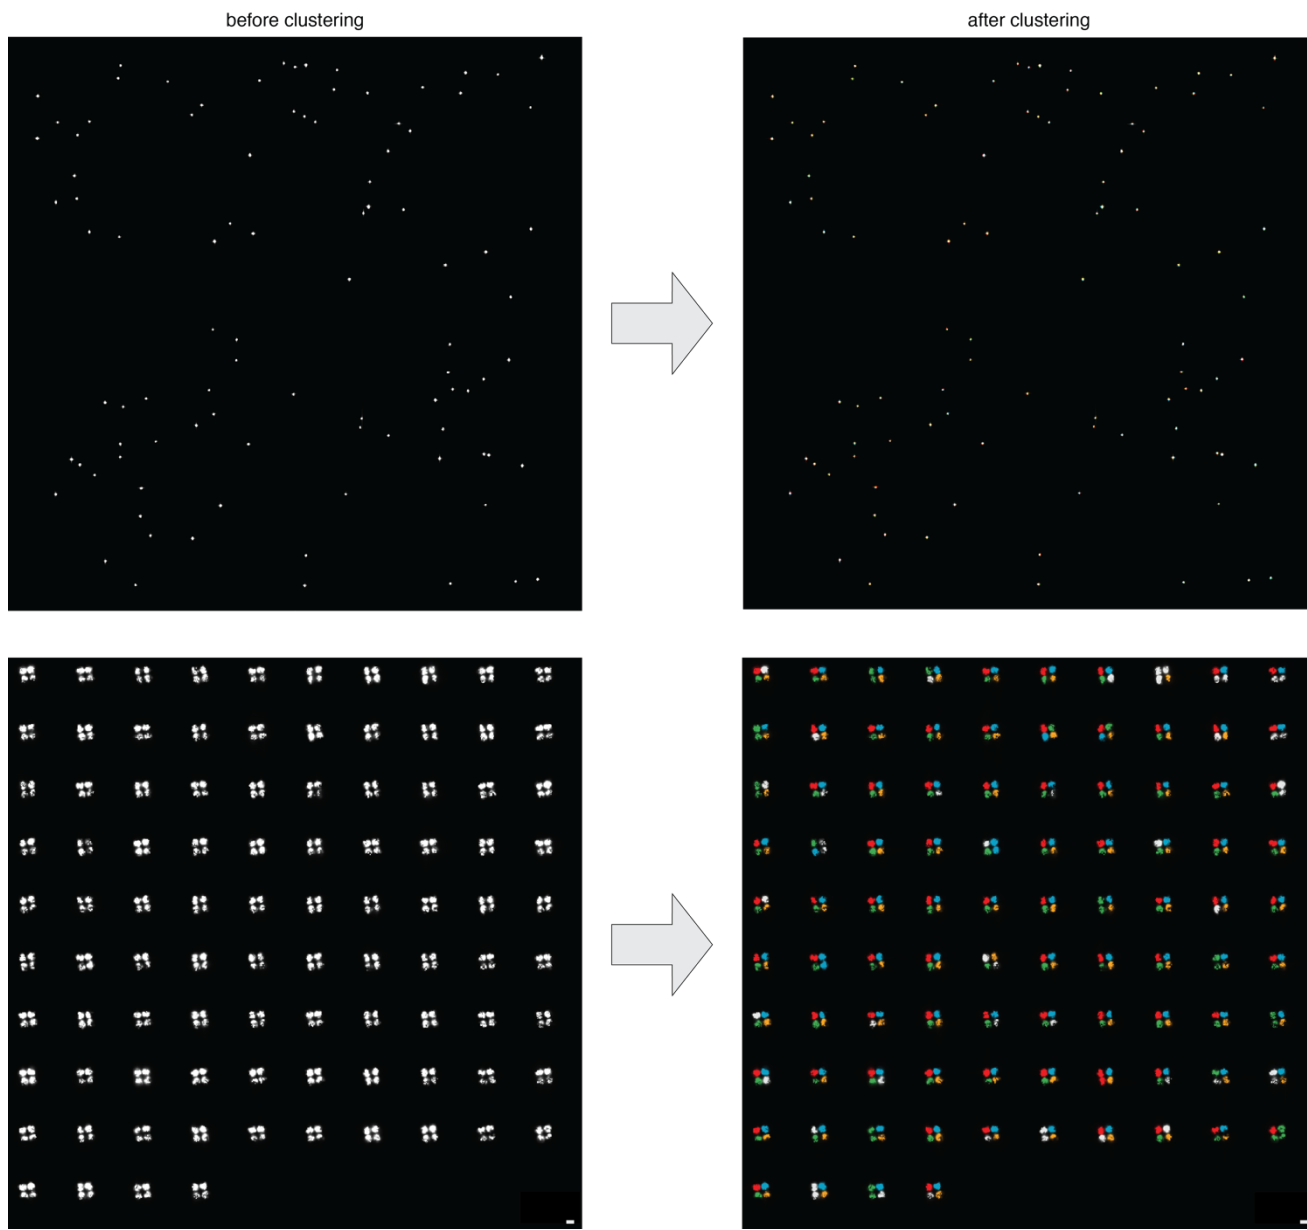

**Supplementary Figure 8 | Four-corner DNA origami structures before and after cluster identification.** Images of four corner DNA origami structures on coverslip before and after clustering of the four corners of each structure (**top**). A higher magnification image of picked origami structures rendered in ordered succession, before and after clustering (**bottom**). Each corner was then picked individually, and all localizations were run through the HDBSCAN algorithm. Results of the clustering algorithm can be seen on the bottom right image, with the identified corners shown in color. As expected we were able to assign the four corners to the four different kinetic populations according to their blinking behavior, even with the lower number of binding sites. Scale bars: 40 nm.

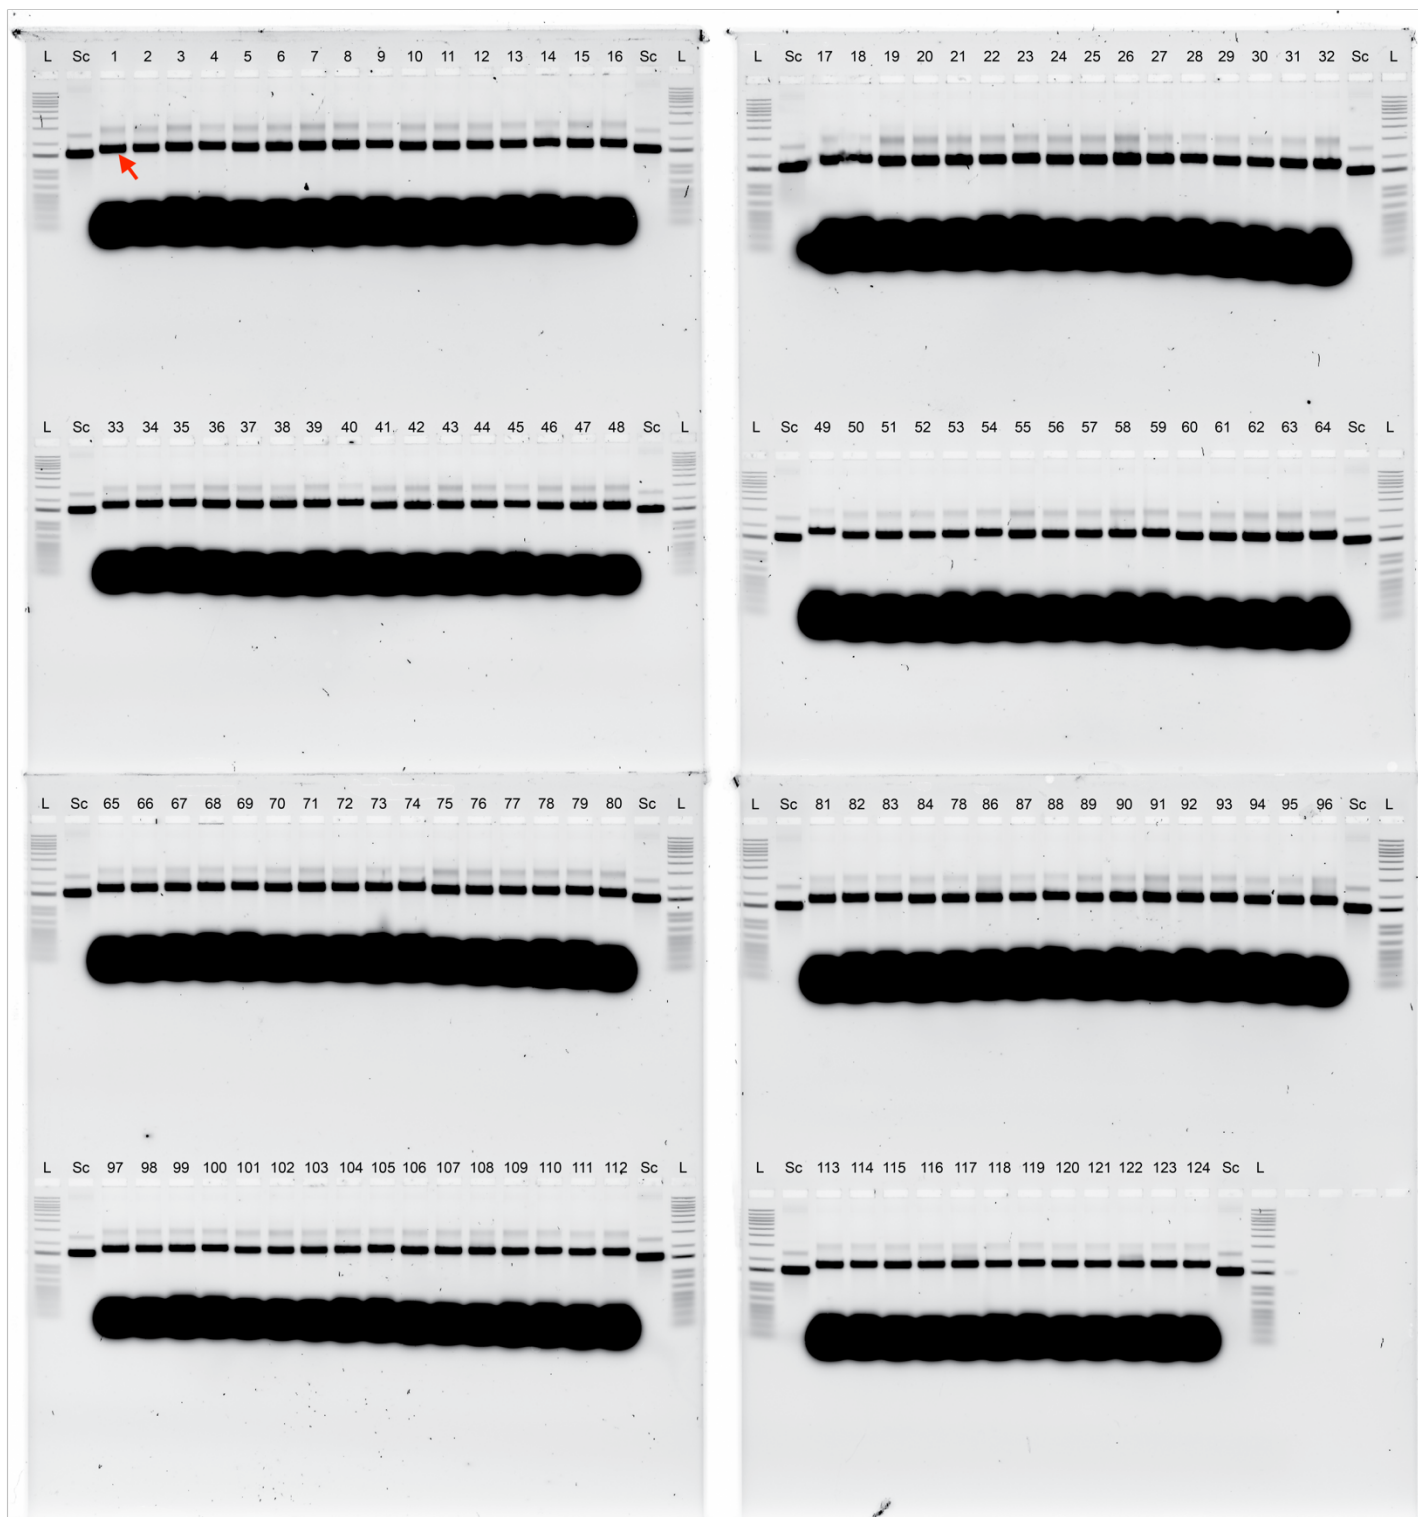

**Supplementary Figure 9 | Agarose gels of the 124 individual DNA origami structures.** Fluorescent scan of the agarose gels of the 124 individual frequency barcodes (1.5% agarose, 1×TAE buffer + 10mM MgCl<sub>2</sub>, 1× SybrSafe stain). All individual monomer bands (monomer band for barcode ID = 1 is indicated by red arrow) were physically extracted from the gel and the structures purified using Freeze<sup>4</sup>N<sup>3</sup>Squeeze spin columns. L: Ladder, Sc: Scaffold strands.

## Supplementary Tables

### Supplementary Table 1 | DNA-PAINT imager strands

| Name | Sequence         | Dye on 3'-end   |
|------|------------------|-----------------|
| P1   | 5'-CTAGATGTAT-3' | Atto655         |
| P2   | 5'-TATGTAGATC-3' | Cy3B            |
| P3   | 5'-GTAATGAAGA-3' | Atto488 or Cy3B |
| P12  | 5'-GCTCTAACTA-3' | Cy3B            |
| P13  | 5'-CCTTCTCTAT-3' | Cy3B            |

### Supplementary Table 2 | Core staple strands for rectangular DNA origami

| Position | Name                  | Sequence                                 |
|----------|-----------------------|------------------------------------------|
| A1       | 21 [32] 23 [31] BLK   | TTTTCACTCAAAGGGCGAAAAACCATCACC           |
| B1       | 23 [32] 22 [48] BLK   | CAAATCAAGTTTTTTGGGGTCGAAACGTGGA          |
| C1       | 21 [56] 23 [63] BLK   | AGCTGATTGCCCTTCAGAGTCCACTATTAAGGGTGCCGT  |
| D1       | 23 [64] 22 [80] BLK   | AAAGCACTAAATCGGAACCCTAATCCAGTT           |
| E1       | 21 [96] 23 [95] BLK   | AGCAAGCGTAGGGTTGAGTGTGTAGGGAGCC          |
| F1       | 23 [96] 22 [112] BLK  | CCCGATTTAGAGCTTGACGGGGAAAAAGAATA         |
| G1       | 21 [120] 23 [127] BLK | CCCAGCAGGCGAAAAATCCCTTATAAATCAAGCCGGCG   |
| H1       | 21 [160] 22 [144] BLK | TCAATATCGAACCTCAAATATCAATTCGGAAA         |
| I1       | 23 [128] 23 [159] BLK | AACGTGGCGAGAAAGGAAGGGAAACCAGTAA          |
| J1       | 23 [160] 22 [176] BLK | TAAAAGGGACATTCTGGCCAACAAAGCATC           |
| K1       | 21 [184] 23 [191] BLK | TCAACAGTTGAAAGGAGCAAATGAAAAATCTAGAGATAGA |
| L1       | 23 [192] 22 [208] BLK | ACCCTTCTGACCTGAAAGCGTAAGACGCTGAG         |
| M1       | 21 [224] 23 [223] BLK | CTTTAGGGCCTGCAACAGTGCCAATACGTG           |
| N1       | 23 [224] 22 [240] BLK | GCACAGACAATATTTTTGAATGGGGTCAGTA          |
| O1       | 21 [248] 23 [255] BLK | AGATTAGAGCCGTCAAAAAACAGAGGTGAGGCCTATTAGT |
| P1       | 23 [256] 22 [272] BLK | CTTTAATGCGCGAACTGATAGCCCCACCAG           |
| A2       | 19 [32] 21 [31] BLK   | GTCGACTTCGGCCAACGCGGGGTTTTTC             |
| B2       | 22 [47] 20 [48] BLK   | CTCCAACGCAGTGAGACGGGCAACCAGCTGCA         |
| D2       | 22 [79] 20 [80] BLK   | TGGAACAACCGCCTGGCCCTGAGGCCCGCT           |
| E2       | 19 [96] 21 [95] BLK   | CTGTGTGATTGCGTTGCGCTCACTAGAGTTGC         |
| F2       | 22 [111] 20 [112] BLK | GCCCAGAGTCCACGCTGGTTTGACGCTAACT          |
| H2       | 19 [160] 20 [144] BLK | GCAATTCACATATTCCTGATTATCAAAGTGTA         |
| I2       | 22 [143] 21 [159] BLK | TCGGCAAATCCTGTTTGATGGTGGACCCTCAA         |
| J2       | 22 [175] 20 [176] BLK | ACCTTGCTTGGTCAGTTGGCAAAGAGCGGA           |
| L2       | 22 [207] 20 [208] BLK | AGCCAGCAATTGAGGAAGTTATCATCATTTT          |

|    |                   |                                                   |
|----|-------------------|---------------------------------------------------|
| M2 | 19[224]21[223]BLK | CTACCATAGTTTGAGTAACATTTAAAAATAT                   |
| N2 | 22[239]20[240]BLK | TTAACACCAGCACTAACAACTAATCGTTATTA                  |
| P2 | 22[271]20[272]BLK | CAGAAGATTAGATAATACATTTGTCGACAA                    |
| A3 | 17[32]19[31]BLK   | TGCATCTTTCCAGTCACGACGGCCTGCAG                     |
| B3 | 20[47]18[48]BLK   | TTAATGAACTAGAGGATCCCCGGGGGTAACG                   |
| D3 | 20[79]18[80]BLK   | TTCCAGTCGTAATCATGGTCATAAAAGGGG                    |
| E3 | 17[96]19[95]BLK   | GCTTCCGATTACGCCAGCTGGCGGCTGTTTC                   |
| F3 | 20[111]18[112]BLK | CACATTAATAATGTTATCCGCTCATGCGGGCC                  |
| H3 | 17[160]18[144]BLK | AGAAAACAAAGAAGATGATGAAACAGGCTGCG                  |
| I3 | 20[143]19[159]BLK | AAGCCTGGTACGAGCCGGAAGCATAGATGATG                  |
| J3 | 20[175]18[176]BLK | ATTATCATTCAATATAATCCTGACAATTAC                    |
| L3 | 20[207]18[208]BLK | GCGGAACATCTGAATAATGGAAGGTACAAAAT                  |
| M3 | 17[224]19[223]BLK | CATAAATCTTTGAATACCAAGTGTAGAAC                     |
| N3 | 20[239]18[240]BLK | ATTTTAAAATCAAAATTATTTGCACGGATTCCG                 |
| P3 | 20[271]18[272]BLK | CTCGTATTAGAAATGCGTAGATACAGTAC                     |
| A4 | 15[32]17[31]BLK   | TAATCAGCGGATTGACCGTAATCGTAACCG                    |
| B4 | 18[47]16[48]BLK   | CCAGGGTTGCCAGTTTGGGGGACCCGTGGGA                   |
| C4 | 15[64]18[64]BLK   | GTATAAGCCAACCCGTCGGATTCTGACGACAGTATCGGCCGCAAGGCG  |
| D4 | 18[79]16[80]BLK   | GATGTGCTTCAGGAAGATCGCACAATGTGA                    |
| E4 | 15[96]17[95]BLK   | ATATTTTGGCTTTCATCAACATTATCCAGCCA                  |
| F4 | 18[111]16[112]BLK | TCTTCGCTGCACCGCTTCTGGTGGCGCCTTCC                  |
| G4 | 15[128]18[128]BLK | TAAATCAAAATAATTCGCGTCTCGGAAACCAGGCAAAGGGAAGG      |
| H4 | 15[160]16[144]BLK | ATCGCAAGTATGTAAATGCTGATGATAGGAAC                  |
| I4 | 18[143]17[159]BLK | CAACTGTTGCGCCATTTCGCCATTCAAACATCA                 |
| J4 | 18[175]16[176]BLK | CTGAGCAAAAATTAATTACATTTTGGGTTA                    |
| K4 | 15[192]18[192]BLK | TCAAATATAACCTCCGGCTTAGGTAACAATTTTCATTTGAAGGCGAATT |
| L4 | 18[207]16[208]BLK | CGCGCAGATTACCTTTTTTAATGGGAGAGACT                  |
| M4 | 15[224]17[223]BLK | CCTAAATCAAAATCATAGGTCTAAACAGTA                    |
| N4 | 18[239]16[240]BLK | CCTGATTGCAATATATGTGAGTGATCAATAGT                  |
| O4 | 15[256]18[256]BLK | GTGATAAAAAGACGCTGAGAAGAGATAACCTTGCTTCTGTTCGGGAGA  |
| P4 | 18[271]16[272]BLK | CTTTTACAAAATCGTCGCTATTAGCGATAG                    |
| A5 | 13[32]15[31]BLK   | AACGCAAAATCGATGAACGGTACCGGTTGA                    |
| B5 | 16[47]14[48]BLK   | ACAAACGGAAAAGCCCCAAAACACTGGAGCA                   |
| C5 | 13[64]15[63]BLK   | TATATTTTGTTCATTGCCTGAGAGTGGAAGATT                 |
| D5 | 16[79]14[80]BLK   | GCGAGTAAAAATATTTAAATTGTTACAAAG                    |
| E5 | 13[96]15[95]BLK   | TAGGTAAACTATTTTTGAGAGATCAAACGTTA                  |
| F5 | 16[111]14[112]BLK | TGTAGCCATTAATAATTCGCATTAATGCCGGA                  |
| G5 | 13[128]15[127]BLK | GAGACAGCTAGCTGATAAATTAATTTTTGT                    |

|    |                   |                                   |
|----|-------------------|-----------------------------------|
| H5 | 13[160]14[144]BLK | GTAATAAGTTAGGCAGAGGCATTTATGATATT  |
| I5 | 16[143]15[159]BLK | GCCATCAAGCTCATTTTTTAACCCAAATCCA   |
| J5 | 16[175]14[176]BLK | TATAACTAACAAAGAACGCGAGAACGCCAA    |
| K5 | 13[192]15[191]BLK | GTAAAGTAATCGCCATATTTAACAAAACCTTTT |
| L5 | 16[207]14[208]BLK | ACCTTTTTATTTTAGTTAATTTTCATAGGGCTT |
| M5 | 13[224]15[223]BLK | ACAACATGCCAACGCTCAACAGTCTTCTGA    |
| N5 | 16[239]14[240]BLK | GAATTTATTTAATGGTTTGAATATTCTTACC   |
| O5 | 13[256]15[255]BLK | GTTTATCAATATGCGTTATACAAACCGACCGT  |
| P5 | 16[271]14[272]BLK | CTTAGATTTAAGGCGTTAAATAAAGCCTGT    |
| A6 | 11[32]13[31]BLK   | AACAGTTTTGTACCAAAAACATTTTATTTTC   |
| B6 | 14[47]12[48]BLK   | AACAAGAGGGATAAAAAATTTTTAGCATAAAGC |
| C6 | 11[64]13[63]BLK   | GATTTAGTCAATAAAGCCTCAGAGAACCCTCA  |
| D6 | 14[79]12[80]BLK   | GCTATCAGAAATGCAATGCCTGAATTAGCA    |
| E6 | 11[96]13[95]BLK   | AATGGTCAACAGGCAAGGCAAAGAGTAATGTG  |
| F6 | 14[111]12[112]BLK | GAGGGTAGGATTCAAAAGGGTGAGACATCCAA  |
| G6 | 11[128]13[127]BLK | TTTGGGGATAGTAGTAGCATTTAAAAGGCCG   |
| H6 | 11[160]12[144]BLK | CCAATAGCTCATCGTAGGAATCATGGCATCAA  |
| I6 | 14[143]13[159]BLK | CAACCGTTTCAAATCACCATCAATTCGAGCCA  |
| J6 | 14[175]12[176]BLK | CATGTAATAGAATATAAAGTACCAAGCCGT    |
| K6 | 11[192]13[191]BLK | TATCCGGTCTCATCGAGAACAAGCGACAAAAG  |
| L6 | 14[207]12[208]BLK | AATTGAGAATTCTGTCCAGACGACTAAACCAA  |
| M6 | 11[224]13[223]BLK | GCGAACCTCCAAGAACGGGTATGACAATAA    |
| N6 | 14[239]12[240]BLK | AGTATAAAGTTCAGCTAATGCAGATGTCTTTC  |
| O6 | 11[256]13[255]BLK | GCCTTAAACCAATCAATAATCGGCACGCGCCT  |
| P6 | 14[271]12[272]BLK | TTAGTATCACAATAGATAAGTCCACGAGCA    |
| A7 | 9[32]11[31]BLK    | TTTACCCCAACATGTTTTAAATTTCCATAT    |
| B7 | 12[47]10[48]BLK   | TAAATCGGGATTCCTCAATTCTGCGATATAATG |
| C7 | 9[64]11[63]BLK    | CGGATGCAGAGCTTAATTGCTGAAACGAGTA   |
| D7 | 12[79]10[80]BLK   | AAATTAAGTTGACCATTAGATACTTTTGCG    |
| E7 | 9[96]11[95]BLK    | CGAAAGACTTTGATAAGAGGTCATATTTGCA   |
| F7 | 12[111]10[112]BLK | TAAATCATATAACCTGTTTAGCTAACCTTTAA  |
| G7 | 9[128]11[127]BLK  | GCTTCAATCAGGATTAGAGAGTTATTTTCA    |
| H7 | 9[160]10[144]BLK  | AGAGAGAAAAAATGAAAATAGCAAGCAAAC    |
| I7 | 12[143]11[159]BLK | TTCTACTACGCGAGCTGAAAAGGTTACCGCGC  |
| J7 | 12[175]10[176]BLK | TTTTATTTAAGCAAATCAGATATTTTTTGT    |
| K7 | 9[192]11[191]BLK  | TTAGACGGCCAAATAAGAAACGATAGAAGGCT  |
| L7 | 12[207]10[208]BLK | GTACCGCAATTCTAAGAACGCGAGTATTATTT  |
| M7 | 9[224]11[223]BLK  | AAAGTCACAAAATAAACAGCCAGCGTTTTTA   |

|     |                       |                                          |
|-----|-----------------------|------------------------------------------|
| N7  | 12 [239] 10 [240] BLK | CTTATCATTCCCGACTTGCGGGAGCCTAATTT         |
| O7  | 9 [256] 11 [255] BLK  | GAGAGATAGAGCGTCTTTCCAGAGTTTTGAA          |
| P7  | 12 [271] 10 [272] BLK | TGTAGAAATCAAGATTAGTTGCTCTTACCA           |
| A8  | 7 [32] 9 [31] BLK     | TTTAGGACAAATGCTTTAAACAATCAGGTC           |
| B8  | 10 [47] 8 [48] BLK    | CTGTAGCTTGACTIONTATTATAGTCAGTTCATTGA     |
| C8  | 7 [56] 9 [63] BLK     | ATGCAGATACATAACGGGAATCGTCATAAATAAAGCAAAG |
| D8  | 10 [79] 8 [80] BLK    | GATGGCTTATCAAAAAGATTAAGAGCGTCC           |
| E8  | 7 [96] 9 [95] BLK     | TAAGAGCAAATGTTTAGACTGGATAGGAAGCC         |
| F8  | 10 [111] 8 [112] BLK  | TTGCTCCTTTCAAATATCGCGTTTGAGGGGGT         |
| G8  | 7 [120] 9 [127] BLK   | CGTTTACCAGACGACAAAGAAGTTTTGCCATAATTCGA   |
| H8  | 7 [160] 8 [144] BLK   | TTATTACGAAGAACTGGCATGATTGCGAGAGG         |
| I8  | 10 [143] 9 [159] BLK  | CCAACAGGAGCGAACCCAGACCCGGAGCCTTTAC       |
| J8  | 10 [175] 8 [176] BLK  | TTAACGTCTAACATAAAAACAGGTAACGGA           |
| K8  | 7 [184] 9 [191] BLK   | CGTAGAAAATACATACCGAGGAAACGCAATAAGAAGCGCA |
| L8  | 10 [207] 8 [208] BLK  | ATCCCAATGAGAATTAACCTGAACAGTTACCAG        |
| M8  | 7 [224] 9 [223] BLK   | AACGCAAAGATAGCCGAACAAACCCTGAAC           |
| N8  | 10 [239] 8 [240] BLK  | GCCAGTTAGAGGGTAATTGAGCGCTTTAAGAA         |
| O8  | 7 [248] 9 [255] BLK   | GTTTTATTTTGTCAATCTTACCGAAGCCCTTTAATATCA  |
| P8  | 10 [271] 8 [272] BLK  | ACGCTAACACCCACAAGAATTGAAAATAGC           |
| A9  | 5 [32] 7 [31] BLK     | CATCAAGTAAAACGAACTAACGAGTTGAGA           |
| B9  | 8 [47] 6 [48] BLK     | ATCCCCCTATACCACATTCAACTAGAAAAATC         |
| D9  | 8 [79] 6 [80] BLK     | AATACTGCCCAAAAGGAATTACGTGGCTCA           |
| E9  | 5 [96] 7 [95] BLK     | TCATTCAGATGCGATTTTAAGAACAGGCATAG         |
| F9  | 8 [111] 6 [112] BLK   | AATAGTAAACACTATCATAACCCTCATTGTGA         |
| H9  | 5 [160] 6 [144] BLK   | GCAAGGCCTCACCAGTAGCACCATGGGCTTGA         |
| I9  | 8 [143] 7 [159] BLK   | CTTTTGAGATAAAAAACAAAATAAAGACTCC          |
| J9  | 8 [175] 6 [176] BLK   | ATACCCAACAGTATGTTAGCAAATTAGAGC           |
| L9  | 8 [207] 6 [208] BLK   | AAGGAAACATAAAGGTGGCAACATTATCACCG         |
| M9  | 5 [224] 7 [223] BLK   | TCAAGTTTCATTAAAGGTGAATATAAAAGA           |
| N9  | 8 [239] 6 [240] BLK   | AAGTAAGCAGACACCACGGAATAATATTGAGC         |
| P9  | 8 [271] 6 [272] BLK   | AATAGCTATCAATAGAAAATTCAACATTCA           |
| A10 | 3 [32] 5 [31] BLK     | AATACGTTTGAAAGAGGACAGACTGACCTT           |
| B10 | 6 [47] 4 [48] BLK     | TACGTTAAAGTAATCTTGACAAGAACCAGACT         |
| D10 | 6 [79] 4 [80] BLK     | TTATACCACCAAATCAACGTAACGAACGAG           |
| E10 | 3 [96] 5 [95] BLK     | ACACTCATCCATGTTACTTAGCCGAAAGCTGC         |
| F10 | 6 [111] 4 [112] BLK   | ATTACCTTTGAATAAAGGCTTGCCCAAATCCGC        |
| H10 | 3 [160] 4 [144] BLK   | TTGACAGGCCACCACCAGAGCCGCGATTTGTA         |
| I10 | 6 [143] 5 [159] BLK   | GATGGTTTGAACGAGTAGTAAATTTACCATTA         |

|     |                 |                                                  |
|-----|-----------------|--------------------------------------------------|
| J10 | 6[175]4[176]BLK | CAGCAAAGGAAACGTCACCAATGAGCCGC                    |
| L10 | 6[207]4[208]BLK | TCACCGACGCACCGTAATCAGTAGCAGAACCG                 |
| M10 | 3[224]5[223]BLK | TTAAAGCCAGAGCCGCCACCCCTCGACAGAA                  |
| N10 | 6[239]4[240]BLK | GAAATTATTGCCTTTAGCGTCAGACCGGAACC                 |
| P10 | 6[271]4[272]BLK | ACCGATTGTCCGGCATTTTCGGTCATAATCA                  |
| A11 | 1[32]3[31]BLK   | AGGCTCCAGAGGCTTTGAGGACACGGGTAA                   |
| B11 | 4[47]2[48]BLK   | GACCAACTAATGCCACTACGAAGGGGGTAGCA                 |
| C11 | 1[64]4[64]BLK   | TTTATCAGGACAGCATCGGAACGACACCAACCTAAAACGAGGTCAATC |
| D11 | 4[79]2[80]BLK   | GCGCAGACAAGAGGCAAAGAATCCCTCAG                    |
| E11 | 1[96]3[95]BLK   | AAACAGCTTTTTGCGGGATCGTCAACACTAAA                 |
| F11 | 4[111]2[112]BLK | GACCTGCTCTTTGACCCCCAGCGAGGGAGTTA                 |
| G11 | 1[128]4[128]BLK | TGACAACTCGCTGAGGCTTGCATTATACCAAGCGCATGATAAA      |
| H11 | 1[160]2[144]BLK | TTAGGATTGGCTGAGACTCCTCAATAACCGAT                 |
| I11 | 4[143]3[159]BLK | TCATCGCCAACAAAGTACAACGGACGCCAGCA                 |
| J11 | 4[175]2[176]BLK | CACCAGAAAGGTTGAGGCAGGTCATGAAAG                   |
| K11 | 1[192]4[192]BLK | GCGGATAACCTATTATTCTGAAACAGACGATTGGCCTTGAAGAGCCAC |
| L11 | 4[207]2[208]BLK | CCACCTCTATTCAAAACAAATACCTGCCTA                   |
| M11 | 1[224]3[223]BLK | GTATAGCAAACAGTTAATGCCCAATCCTCA                   |
| N11 | 4[239]2[240]BLK | GCCTCCCTCAGAATGGAAAGCGCAGTAACAGT                 |
| O11 | 1[256]4[256]BLK | CAGGAGGTGGGGTCAGTGCCTTGAGTCTCTGAATTTACCGGGAACCAG |
| P11 | 4[271]2[272]BLK | AAATCACCTTCCAGTAAGCGTCAGTAATAA                   |
| A12 | 0[47]1[31]BLK   | AGAAAGGAACAACATAAGGAATTCAAAAAA                   |
| B12 | 2[47]0[48]BLK   | ACGGCTACAAAAGGAGCCTTTAATGTGAGAAT                 |
| C12 | 0[79]1[63]BLK   | ACAACCTTCAACAGTTTCAGCGGATGTATCGG                 |
| D12 | 2[79]0[80]BLK   | CAGCGAAACTTGCTTTCGAGGTGTTGCTAA                   |
| E12 | 0[111]1[95]BLK  | TAAATGAATTTTCTGTATGGGATTAATTTCTT                 |
| F12 | 2[111]0[112]BLK | AAGGCCGCTGATACCGATAGTTGCGACGTTAG                 |
| G12 | 0[143]1[127]BLK | TCATAAGTTTTGTCGTCTTTCAGCCGACAA                   |
| H12 | 0[175]0[144]BLK | TCCACAGACAGCCCTCATAGTTAGCGTAACGA                 |
| I12 | 2[143]1[159]BLK | ATATTCCGAACCATCGCCCACGCAGAGAAGGA                 |
| J12 | 2[175]0[176]BLK | TATTAAGAAGCGGGTTTTGCTCGTAGCAT                    |
| K12 | 0[207]1[191]BLK | TCACCAGTACAACTACAACGCCTAGTACCAG                  |
| L12 | 2[207]0[208]BLK | TTTCGGAAGTGCCGTCGAGAGGGTGAGTTTCG                 |
| M12 | 0[239]1[223]BLK | AGGAACCCATGTACCGTAACACTTGATATAA                  |
| N12 | 2[239]0[240]BLK | GCCCGTATCCGGAATAGGTGTATCAGCCAAT                  |
| O12 | 0[271]1[255]BLK | CCACCTCATTTTCAGGGATAGCAACCGTACT                  |
| P12 | 2[271]0[272]BLK | GTTTTAACTTAGTACCGCCACCCAGAGCCA                   |

### Supplementary Table 3 | Biotinylated staple strands

| No | Pos | Name                 | Sequence                                 | Modification |
|----|-----|----------------------|------------------------------------------|--------------|
| 1  | C02 | 18[63]20[56]BIOTIN   | ATTAAGTTTACCGAGCTCGAATTCGGGAAACCTGTCGTGC | 5'-BT        |
| 2  | C09 | 4[63]6[56]BIOTIN     | ATAAGGGAACCGGATATTCATTACGTCAGGACGTTGGGAA | 5'-BT        |
| 3  | G02 | 18[127]20[120]BIOTIN | GCGATCGGCAATTCACACAACAGGTGCCTAATGAGTG    | 5'-BT        |
| 4  | G09 | 4[127]6[120]BIOTIN   | TTGTGTCGTGACGAGAAACACCAAATTTCAACTTTAAT   | 5'-BT        |
| 5  | K02 | 18[191]20[184]BIOTIN | ATTCATTTTTGTTTGGATTATACTAAGAAACCACCAGAAG | 5'-BT        |
| 6  | K09 | 4[191]6[184]BIOTIN   | CACCCTCAGAAACCATCGATAGCATTGAGCCATTTGGGAA | 5'-BT        |
| 7  | O02 | 18[255]20[248]BIOTIN | AACAATAACGTAAAACAGAAATAAAAATCCTTTGCCCGAA | 5'-BT        |
| 8  | O09 | 4[255]6[248]BIOTIN   | AGCCACCACTGTAGCGCGTTTTCAAGGGAGGGAAGGTAAA | 5'-BT        |

**Supplementary Table 4 | Modified staple strands for DNA origami.** The underlined 3'-end sequence (same for all the modified staples) is specific for the structures with 40 domains of 8nt length. Supplementary Table 5 contains the sequences modifications corresponding to the other three DNA origami species used in the experiments.

| No | Pos | Name           | Sequence                                          |
|----|-----|----------------|---------------------------------------------------|
| 1  | A1  | P3(40,8)_1_B3  | TTAATGAACTAGAGGATCCCCGGGGGTAACG <u>TTTCTTCATT</u> |
| 2  | A2  | P3(40,8)_1_B5  | ACAAACGGAAAAGCCCCAAAAACACTGGAGCATTTCTTCATT        |
| 3  | A3  | P3(40,8)_1_B7  | TAAATCGGGATTCCCAATTCCTGCGATATAATGTTTCTTCATT       |
| 4  | A4  | P3(40,8)_1_B9  | ATCCCCCTATACCACATTCAACTAGAAAAATCTTTCTTCATT        |
| 5  | A5  | P3(40,8)_1_B11 | GACCAACTAATGCCACTACGAAGGGGGTAGCATTTCTTCATT        |
| 6  | A6  | P3(40,8)_1_D3  | TTCCAGTCGTAATCATGGTCATAAAAGGGGTTTCTTCATT          |
| 7  | A7  | P3(40,8)_1_D5  | GCGAGTAAAAATATTTAAATTGTTACAAAGTTTCTTCATT          |
| 8  | A8  | P3(40,8)_1_D7  | AAATTAAGTTGACCATTAGATACTTTTGCCTTTCTTCATT          |
| 9  | A9  | P3(40,8)_1_D9  | AATACTGCCCAAAGGAATTACGTGGCTCATTTCTTCATT           |
| 10 | A10 | P3(40,8)_1_D11 | GCGCAGACAAGAGGCAAAGAATCCCTCAGTTTCTTCATT           |
| 11 | A11 | P3(40,8)_1_F3  | CACATTAATAATGTTATCCGCTCATGCGGGCCTTTCTTCATT        |
| 12 | A12 | P3(40,8)_1_F5  | TGTAGCCATTAATAATTCGCATTAATGCCGGATTTCTTCATT        |
| 13 | B1  | P3(40,8)_1_F7  | TAAATCATATAACCTGTTTAGCTAACCTTTAATTTCTTCATT        |
| 14 | B2  | P3(40,8)_1_F9  | AATAGTAAACACTATCATAACCCTCATTGTGATTTCTTCATT        |
| 15 | B3  | P3(40,8)_1_F11 | GACCTGCTCTTTGACCCCCAGCGAGGGAGTTATTTCTTCATT        |
| 16 | B4  | P3(40,8)_1_H3  | AGAAAACAAAGAAGATGATGAAACAGGCTGCGTTTCTTCATT        |
| 17 | B5  | P3(40,8)_1_H5  | GTAATAAGTTAGGCAGAGGCATTTATGATATTTTTCTTCATT        |
| 18 | B6  | P3(40,8)_1_H7  | AGAGAGAAAAAATGAAAATAGCAAGCAAACCTTTTCTTCATT        |
| 19 | B7  | P3(40,8)_1_H9  | GCAAGGCCTACCAGTAGCACCATGGGCTTGATTTCTTCATT         |
| 20 | B8  | P3(40,8)_1_H11 | TTAGGATTGGCTGAGACTCCTCAATAACCGATTTTCTTCATT        |
| 21 | B9  | P3(40,8)_2_B3  | ATTATCATTCAAATAATCCTGACAATTACTTTCTTCATT           |
| 22 | B10 | P3(40,8)_2_B5  | TATAACTAACAAAGAACGCGAGAACGCCAATTTCTTCATT          |
| 23 | B11 | P3(40,8)_2_B7  | TTTTATTTAAGCAAATCAGATATTTTTTGTTTCTTCATT           |
| 24 | B12 | P3(40,8)_2_B9  | ATACCCAACAGTATGTTAGCAAATTAGAGCTTTCTTCATT          |



|    |     |                |                                             |
|----|-----|----------------|---------------------------------------------|
| 25 | C1  | P3(40,8)_2_B11 | CACCAGAAAGGTTGAGGCAGGTCATGAAAGTTTCTTCATT    |
| 26 | C2  | P3(40,8)_2_D3  | GCGGAACATCTGAATAATGGAAGGTACAAAATTTTCTTCATT  |
| 27 | C3  | P3(40,8)_2_D5  | ACCTTTTTATTTTAGTTAATTTTCATAGGGCTTTTTCTTCATT |
| 28 | C4  | P3(40,8)_2_D7  | GTACCGCAATCTAAGAACGCGAGTATTATTTTTCTTCATT    |
| 29 | C5  | P3(40,8)_2_D9  | AAGGAAACATAAAGGTGGCAACATTATCACCGTTTCTTCATT  |
| 30 | C6  | P3(40,8)_2_D11 | CCACCCTCTATTCACAAACAAATACCTGCCTATTTCTTCATT  |
| 31 | C7  | P3(40,8)_2_F3  | ATTTTAAATCAAATTTATTTGCACGGATTCGTTTCTTCATT   |
| 32 | C8  | P3(40,8)_2_F5  | GAATTTATTTAATGGTTTGAATATTCTTACCTTTCTTCATT   |
| 33 | C9  | P3(40,8)_2_F7  | CTTATCATTTCCGACTTGCGGGAGCCTAATTTTTCTTCATT   |
| 34 | C10 | P3(40,8)_2_F9  | AAGTAAGCAGACACCACGGAATAATATTGACGTTTCTTCATT  |
| 35 | C11 | P3(40,8)_2_F11 | GCCTCCCTCAGAATGGAAAGCGCAGTAACAGTTTCTTCATT   |
| 36 | C12 | P3(40,8)_2_H3  | CTCGTATTAGAAATTGCGTAGATACAGTACTTTCTTCATT    |
| 37 | D1  | P3(40,8)_2_H5  | CTTAGATTTAAGGCGTTAAATAAAGCCTGTTTCTTCATT     |
| 38 | D2  | P3(40,8)_2_H7  | TGTAGAAATCAAGATTAGTTGCTCTTACCATTCTTCATT     |
| 39 | D3  | P3(40,8)_2_H9  | AATAGCTATCAATAGAAAATCAACATTCTTCATT          |
| 40 | D4  | P3(40,8)_2_H11 | AAATCACCTCCAGTAAGCGTCAGTAATAATTTCTTCATT     |

### Supplementary Table 5 | List of DNA-PAINT handles

| Name        | Sequence added to 3' ends of core staples        |
|-------------|--------------------------------------------------|
| P3-40-8nt   | 5' -TT-TCTTCATT-3'                               |
| P3-40-10nt  | 5' -TT-TCTTCATTAC-3'                             |
| P3-120-8nt  | 5' -TT-TCTTCATT-TT-TCTTCATT-TT-TCTTCATT-3'       |
| P3-120-10nt | 5' -TT-TCTTCATTAC-TT-TCTTCATTAC-TT-TCTTCATTAC-3' |

### Supplementary Table 6 | RNA-FISH probe set targeting MKI67 mRNA variant 2

| No. | Name                | Sequence                                                         |
|-----|---------------------|------------------------------------------------------------------|
| 1   | MKI67_P3Plus_120_1  | gccagaagcaaatttacaactc-TT-TCTTCATTAGCG TT-TCTTCATTA-TT-TCTTCATTA |
| 2   | MKI67_P3Plus_120_2  | cagtaagttgagtataatccgtTTTCTTCATTAGCGTTTCTTCATTATTTCTTCATTA       |
| 3   | MKI67_P3Plus_120_3  | tttgcaatggttttgacacaTTTCTTCATTAGCGTTTCTTCATTATTTCTTCATTA         |
| 4   | MKI67_P3Plus_120_4  | aattatgtaaatattgcctcctgTTTCTTCATTAGCGTTTCTTCATTATTTCTTCATTA      |
| 5   | MKI67_P3Plus_120_5  | aataacagaccatttacttgtTTTCTTCATTAGCGTTTCTTCATTATTTCTTCATTA        |
| 6   | MKI67_P3Plus_120_6  | tagttattacatctccatgtttTTTCTTCATTAGCGTTTCTTCATTATTTCTTCATTA       |
| 7   | MKI67_P3Plus_120_7  | gactttcattttcatacctgaaTTTCTTCATTAGCGTTTCTTCATTATTTCTTCATTA       |
| 8   | MKI67_P3Plus_120_8  | gagaagctagatcttgagacacTTTCTTCATTAGCGTTTCTTCATTATTTCTTCATTA       |
| 9   | MKI67_P3Plus_120_9  | tattaggaggcaagttttcatcTTTCTTCATTAGCGTTTCTTCATTATTTCTTCATTA       |
| 10  | MKI67_P3Plus_120_10 | cattaccagagactttcttttgTTTCTTCATTAGCGTTTCTTCATTATTTCTTCATTA       |
| 11  | MKI67_P3Plus_120_11 | tgatagacactctcttgaaggTTTCTTCATTAGCGTTTCTTCATTATTTCTTCATTA        |
| 12  | MKI67_P3Plus_120_12 | ttgcaacaatcagatttgcttcTTTCTTCATTAGCGTTTCTTCATTATTTCTTCATTA       |

|    |                     |                                                             |
|----|---------------------|-------------------------------------------------------------|
| 13 | MKI67_P3Plus_120_13 | taaattgactgtgaacttcgccTTTCTTCATTAGCGTTTCTTCATTATTTCTTCATTA  |
| 14 | MKI67_P3Plus_120_14 | tactttttcagtatgagctttcTTTCTTCATTAGCGTTTCTTCATTATTTCTTCATTA  |
| 15 | MKI67_P3Plus_120_15 | aatgaagttgttgagcactctgTTTCTTCATTAGCGTTTCTTCATTATTTCTTCATTA  |
| 16 | MKI67_P3Plus_120_16 | gaaagatcttccttaaagtcctaTTTCTTCATTAGCGTTTCTTCATTATTTCTTCATTA |
| 17 | MKI67_P3Plus_120_17 | gtcttgaacatttcagctattcTTTCTTCATTAGCGTTTCTTCATTATTTCTTCATTA  |
| 18 | MKI67_P3Plus_120_18 | agaacacatttcctccaaaactTTTCTTCATTAGCGTTTCTTCATTATTTCTTCATTA  |
| 19 | MKI67_P3Plus_120_19 | gtttccattttctctaatacacTTTCTTCATTAGCGTTTCTTCATTATTTCTTCATTA  |
| 20 | MKI67_P3Plus_120_20 | cagagaagtcattttgtaggtgTTTCTTCATTAGCGTTTCTTCATTATTTCTTCATTA  |
| 21 | MKI67_P3Plus_120_21 | tgtatattcctgaactctgtagTTTCTTCATTAGCGTTTCTTCATTATTTCTTCATTA  |
| 22 | MKI67_P3Plus_120_22 | tattggttctggttgtaatgacTTTCTTCATTAGCGTTTCTTCATTATTTCTTCATTA  |
| 23 | MKI67_P3Plus_120_23 | tattttggtagttttctcatcaTTTCTTCATTAGCGTTTCTTCATTATTTCTTCATTA  |
| 24 | MKI67_P3Plus_120_24 | aagaattcttcctctacatctgTTTCTTCATTAGCGTTTCTTCATTATTTCTTCATTA  |
| 25 | MKI67_P3Plus_120_25 | gagttccataaatgctttaatTTTCTTCATTAGCGTTTCTTCATTATTTCTTCATTA   |
| 26 | MKI67_P3Plus_120_26 | cgaagaattcttctctacgctcTTTCTTCATTAGCGTTTCTTCATTATTTCTTCATTA  |
| 27 | MKI67_P3Plus_120_27 | aatgcgtagatgtttttctcacTTTCTTCATTAGCGTTTCTTCATTATTTCTTCATTA  |
| 28 | MKI67_P3Plus_120_28 | cagttttatcgttagtcattgaTTTCTTCATTAGCGTTTCTTCATTATTTCTTCATTA  |
| 29 | MKI67_P3Plus_120_29 | agactccataaatgctttcatgTTTCTTCATTAGCGTTTCTTCATTATTTCTTCATTA  |
| 30 | MKI67_P3Plus_120_30 | gtagttttttcgtagtcattgTTTCTTCATTAGCGTTTCTTCATTATTTCTTCATTA   |
| 31 | MKI67_P3Plus_120_31 | tgtctggaaaagctctctgaagTTTCTTCATTAGCGTTTCTTCATTATTTCTTCATTA  |
| 32 | MKI67_P3Plus_120_32 | aatgtggtgatgtctttctctTTTCTTCATTAGCGTTTCTTCATTATTTCTTCATTA   |
| 33 | MKI67_P3Plus_120_33 | gatacttctgtgattttgtcatTTTCTTCATTAGCGTTTCTTCATTATTTCTTCATTA  |
| 34 | MKI67_P3Plus_120_34 | ctattttggtagttttctcatgTTTCTTCATTAGCGTTTCTTCATTATTTCTTCATTA  |
| 35 | MKI67_P3Plus_120_35 | tattttggtagttttctcatcaTTTCTTCATTAGCGTTTCTTCATTATTTCTTCATTA  |
| 36 | MKI67_P3Plus_120_36 | ctgagtgctaaaaattcttcctTTTCTTCATTAGCGTTTCTTCATTATTTCTTCATTA  |
| 37 | MKI67_P3Plus_120_37 | tgtctggaagagttctttgaagTTTCTTCATTAGCGTTTCTTCATTATTTCTTCATTA  |
| 38 | MKI67_P3Plus_120_38 | ttttgtcatcagtcattgattcTTTCTTCATTAGCGTTTCTTCATTATTTCTTCATTA  |
| 39 | MKI67_P3Plus_120_39 | ttaaacgctttgatgctcttacTTTCTTCATTAGCGTTTCTTCATTATTTCTTCATTA  |
| 40 | MKI67_P3Plus_120_40 | acgttgcttcaactttgatgTTTCTTCATTAGCGTTTCTTCATTATTTCTTCATTA    |

**Supplementary Table 7 | RNA-FISH probe set targeting TFRC mRNA variant 4**

| No. | Name               | Sequence                                              |
|-----|--------------------|-------------------------------------------------------|
| 1   | TFRC-P3+_P1+_40-1  | cttatcaactatgatcaccgagTTTCTTCATTAGCGTTTTATACATCTACGG  |
| 2   | TFRC-P3+_P1+_40-2  | cagatgagcatgtccaaagaatTTTCTTCATTAGCGTTTTATACATCTACGG  |
| 3   | TFRC-P3+_P1+_40-3  | tgattgaaggaaggaatccagTTTCTTCATTAGCGTTTTATACATCTACGG   |
| 4   | TFRC-P3+_P1+_40-4  | actacaacatagtgatctggttTTTCTTCATTAGCGTTTTATACATCTACGG  |
| 5   | TFRC-P3+_P1+_40-5  | agaccatattctgagaacatctgTTTCTTCATTAGCGTTTTATACATCTACGG |
| 6   | TFRC-P3+_P1+_40-6  | cactccaactggcaaagataatTTTCTTCATTAGCGTTTTATACATCTACGG  |
| 7   | TFRC-P3+_P1+_40-7  | cctttaaatgcaggagcgaagTTTCTTCATTAGCGTTTTATACATCTACGG   |
| 8   | TFRC-P3+_P1+_40-8  | attcaacatcatgggttagtttTTTCTTCATTAGCGTTTTATACATCTACGG  |
| 9   | TFRC-P3+_P1+_40-9  | cacaaatgaaagcagttggctgTTTCTTCATTAGCGTTTTATACATCTACGG  |
| 10  | TFRC-P3+_P1+_40-10 | aatacagccactgtaaacctcagTTTCTTCATTAGCGTTTTATACATCTACGG |
| 11  | TFRC-P3+_P1+_40-11 | ttattttgtttacgcagtttcaTTTCTTCATTAGCGTTTTATACATCTACGG  |

|    |                    |                                                        |
|----|--------------------|--------------------------------------------------------|
| 12 | TFRC-P3+_P1+_40-12 | taaaactcattgtcaatgtcccTTTCTTCATTAGCGTTTTTATACATCTACGG  |
| 13 | TFRC-P3+_P1+_40-13 | taccaagatgatgggatggaatTTTCTTCATTAGCGTTTTTATACATCTACGG  |
| 14 | TFRC-P3+_P1+_40-14 | tatctaccctgtattaaaagctTTTCTTCATTAGCGTTTTTATACATCTACGG  |
| 15 | TFRC-P3+_P1+_40-15 | attccatcatggacatTTTTTTATTTCTTCATTAGCGTTTTTATACATCTACGG |
| 16 | TFRC-P3+_P1+_40-16 | acaacaacaggaaagaggcagtTTTCTTCATTAGCGTTTTTATACATCTACGG  |
| 17 | TFRC-P3+_P1+_40-17 | aactggtttctgacatTTTCTTCATTAGCGTTTTTATACATCTACGG        |
| 18 | TFRC-P3+_P1+_40-18 | aggattcagagagatcattcacTTTCTTCATTAGCGTTTTTATACATCTACGG  |
| 19 | TFRC-P3+_P1+_40-19 | atggaaaggcttagatctcattTTTCTTCATTAGCGTTTTTATACATCTACGG  |
| 20 | TFRC-P3+_P1+_40-20 | gaatgaggaaaccagctacattTTTCTTCATTAGCGTTTTTATACATCTACGG  |
| 21 | TFRC-P3+_P1+_40-21 | tttggcagcatattattcTTTCTTCATTAGCGTTTTTATACATCTACGG      |
| 22 | TFRC-P3+_P1+_40-22 | cttagcaaccctaattaaattTTTCTTCATTAGCGTTTTTATACATCTACGG   |
| 23 | TFRC-P3+_P1+_40-23 | tcaactgcatttaggaaaaccagTTTCTTCATTAGCGTTTTTATACATCTACGG |
| 24 | TFRC-P3+_P1+_40-24 | gcctttaagtacattgatttaTTTCTTCATTAGCGTTTTTATACATCTACGG   |
| 25 | TFRC-P3+_P1+_40-25 | accttgataaactgagctataTTTCTTCATTAGCGTTTTTATACATCTACGG   |
| 26 | TFRC-P3+_P1+_40-26 | tacagacactgtggtaggtaaaTTTCTTCATTAGCGTTTTTATACATCTACGG  |
| 27 | TFRC-P3+_P1+_40-27 | gaaacactgttcccgataattaTTTCTTCATTAGCGTTTTTATACATCTACGG  |
| 28 | TFRC-P3+_P1+_40-28 | gttgggatacatgtagatactTTTCTTCATTAGCGTTTTTATACATCTACGG   |
| 29 | TFRC-P3+_P1+_40-29 | attaagtagaggacctggagaaTTTCTTCATTAGCGTTTTTATACATCTACGG  |
| 30 | TFRC-P3+_P1+_40-30 | ttaaactgtccgcactaagtTTTCTTCATTAGCGTTTTTATACATCTACGG    |
| 31 | TFRC-P3+_P1+_40-31 | ctctgctttaagtcaaaaggtcTTTCTTCATTAGCGTTTTTATACATCTACGG  |
| 32 | TFRC-P3+_P1+_40-32 | ttaattgatcaccacgaatgggTTTCTTCATTAGCGTTTTTATACATCTACGG  |
| 33 | TFRC-P3+_P1+_40-33 | cagctgatcatcacgtttataaTTTCTTCATTAGCGTTTTTATACATCTACGG  |
| 34 | TFRC-P3+_P1+_40-34 | cacattcaagtgggctgtaaaTTTCTTCATTAGCGTTTTTATACATCTACGG   |
| 35 | TFRC-P3+_P1+_40-35 | atttaagtagctgtgcgtaacaTTTCTTCATTAGCGTTTTTATACATCTACGG  |
| 36 | TFRC-P3+_P1+_40-36 | ttatac gatgaacatgccacatTTTCTTCATTAGCGTTTTTATACATCTACGG |
| 37 | TFRC-P3+_P1+_40-37 | aagtaactcaaccctaactgtaTTTCTTCATTAGCGTTTTTATACATCTACGG  |
| 38 | TFRC-P3+_P1+_40-38 | tgtaactagctgatatttcatTTTCTTCATTAGCGTTTTTATACATCTACGG   |
| 39 | TFRC-P3+_P1+_40-39 | atctccttaacgagaagacatcTTTCTTCATTAGCGTTTTTATACATCTACGG  |
| 40 | TFRC-P3+_P1+_40-40 | ctaacacagtaaaggctcatgcaTTTCTTCATTAGCGTTTTTATACATCTACGG |

**Supplementary Table 8 | Docking sites conjugated to secondary antibodies**

| Antibody        | Docking site | Docking site sequence |
|-----------------|--------------|-----------------------|
| Secondary-Goat  | P12-8        | 5'-TT-TAGTTAGA-3'     |
| Secondary-Mouse | P13-9        | 5'-TT-ATAGAGAGG-3'    |

**Supplementary Table 9 | Staple strands used for 124 color DNA origami structures.** All staple strands are included, except for biotinylated staples (empty rows). Core staple strands were extended with either P1, P2 or P3 handle sequences.

| Plate Position | Oligo Name          | Sequence                                 |
|----------------|---------------------|------------------------------------------|
| A1             | 21 [32] 23 [31] BLK | TTTTCACTCAAAGGGCGAAAAACCATCACC           |
| A2             | 19 [32] 21 [31] P2  | GTCGACTTCGGCCAACGCGGGGTTTTTC TTATCTACATA |

|     |                 |                                                  |
|-----|-----------------|--------------------------------------------------|
| A3  | 17[32]19[31]P3  | TGCATCTTTCCCAGTCACGACGGCCTGCAG TTTCTTCATTA       |
| A4  | 15[32]17[31]P1  | TAATCAGCGGATTGACCGTAATCGTAACCG TTATACATCTA       |
| A5  | 13[32]15[31]P2  | AACGCAAAATCGATGAACGGTACCGGTGA TTATCTACATA        |
| A6  | 11[32]13[31]P3  | AACAGTTTTGTACCAAAAACATTTTATTTT TTTCTTCATTA       |
| A7  | 9[32]11[31]P1   | TTTACCCCAACATGTTTTAAATTTCCATAT TTATACATCTA       |
| A8  | 7[32]9[31]P2    | TTTAGGACAAATGCTTTAAACAATCAGGTC TTATCTACATA       |
| A9  | 5[32]7[31]P1    | CATCAAGTAAAACGAACTAACGAGTTGAGA TTATACATCTA       |
| A10 | 3[32]5[31]P3    | AATACGTTTGAAAGAGGACAGACTGACCTT TTTCTTCATTA       |
| A11 | 1[32]3[31]BLK   | AGGCTCCAGAGGCTTTGAGGACACGGGTAA                   |
| A12 | 0[47]1[31]BLK   | AGAAAGGAACAATAAGGAATTCAAAAAAA                    |
| B1  | 23[32]22[48]BLK | CAAATCAAGTTTTTTGGGGTCGAAACGTGGA                  |
| B2  | 22[47]20[48]P3  | CTCCAACGCAGTGAGACGGGCAACCAGCTGCA TTTCTTCATTA     |
| B3  | 20[47]18[48]P1  | TTAATGAACTAGAGGATCCCCGGGGGTAACG TTATACATCTA      |
| B4  | 18[47]16[48]P2  | CCAGGGTTGCCAGTTTGAGGGGACCCGTGGGA TTATCTACATA     |
| B5  | 16[47]14[48]P3  | ACAAACGGAAAAGCCCCAAAAACACTGGAGCA TTTCTTCATTA     |
| B6  | 14[47]12[48]P1  | AACAAGAGGGATAAAAAATTTTAGCATAAAGC TTATACATCTA     |
| B7  | 12[47]10[48]P2  | TAAATCGGGATTCCCAATCTGCGATATAATG TTATCTACATA      |
| B8  | 10[47]8[48]P3   | CTGTAGCTTGACTATTATAGTCAGTTCATTGA TTTCTTCATTA     |
| B9  | 8[47]6[48]P1    | ATCCCCCTATACCACATTCAACTAGAAAAATC TTATACATCTA     |
| B10 | 6[47]4[48]P2    | TACGTTAAAGTAATCTTGACAAGAACCGAACT TTATCTACATA     |
| B11 | 4[47]2[48]P1    | GACCAACTAATGCCACTACGAAGGGGGTAGCA TTATACATCTA     |
| B12 | 2[47]0[48]BLK   | ACGGCTACAAAAGGAGCCTTAAATGTGAGAAT                 |
| C1  | 21[56]23[63]BLK | AGCTGATTGCCCTTCAGAGTCCACTATTAAGGGTGCCGT          |
| C2  |                 |                                                  |
| C3  |                 |                                                  |
| C4  | 15[64]18[64]BLK | GTATAAGCCAACCCGTCGGATTCTGACGACAGTATCGGCCGCAAGGCG |
| C5  | 13[64]15[63]P2  | TATATTTTGTCAATTGCCTGAGAGTGGAAGATT TTATCTACATA    |
| C6  | 11[64]13[63]P3  | GATTTAGTCAATAAAGCCTCAGAGAACCCTCA TTTCTTCATTA     |
| C7  | 9[64]11[63]P1   | CGGATTGCAGAGCTTAATTGCTGAAACGAGTA TTATACATCTA     |
| C8  | 7[56]9[63]BLK   | ATGCAGATACATAACGGGAATCGTCATAAATAAGCAAAG          |
| C9  |                 |                                                  |
| C10 |                 |                                                  |
| C11 | 1[64]4[64]BLK   | TTTATCAGGACAGCATCGGAACGACACCAACCTAAAACGAGGTCAATC |
| C12 | 0[79]1[63]BLK   | ACAACCTTCAACAGTTTCAGCGGATGTATCGG                 |
| D1  | 23[64]22[80]BLK | AAAGCACTAAATCGGAACCCTAATCCAGTT                   |
| D2  | 22[79]20[80]P3  | TGGAACAACCGCCTGGCCCTGAGGCCCGCT TTTCTTCATTA       |
| D3  | 20[79]18[80]P1  | TTCCAGTCGTAATCATGGTCATAAAAGGGG TTATACATCTA       |
| D4  | 18[79]16[80]P2  | GATGTGCTTCAGGAAGATCGCACAATGTGA TTATCTACATA       |
| D5  | 16[79]14[80]P3  | GCGAGTAAAAATATTTAAATGTTACAAAG TTTCTTCATTA        |
| D6  | 14[79]12[80]P1  | GCTATCAGAAATGCAATGCCTGAATTAGCA TTATACATCTA       |
| D7  | 12[79]10[80]P2  | AAATTAAGTTGACCATTAGATACTTTTGCG TTATCTACATA       |

|     |                   |                                               |
|-----|-------------------|-----------------------------------------------|
| D8  | 10[79]8[80]P3     | GATGGCTTATCAAAAAGATTAAGAGCGTCC TTTCTTCATTA    |
| D9  | 8[79]6[80]P1      | AATACTGCCCAAAAGGAATTACGTGGCTCA TTATACATCTA    |
| D10 | 6[79]4[80]P2      | TTATACCACCAAATCAACGTAACGAACGAG TTATCTACATA    |
| D11 | 4[79]2[80]P3      | GCGCAGACAAGAGGCAAAAAGAATCCCTCAG TTTCTTCATTA   |
| D12 | 2[79]0[80]BLK     | CAGCGAACTTGCTTTTCGAGGTGTTGCTAA                |
| E1  | 21[96]23[95]BLK   | AGCAAGCGTAGGGTTGAGTGTGTAGGGAGCC               |
| E2  | 19[96]21[95]P2    | CTGTGTGATTGCGTTGCGCTCACTAGAGTTGC TTATCTACATA  |
| E3  | 17[96]19[95]P3    | GCTTTCCGATTACGCCAGCTGGCGGCTGTTTC TTTCTTCATTA  |
| E4  | 15[96]17[95]P1    | ATATTTTGGCTTTCATCAACATTATCCAGCCA TTATACATCTA  |
| E5  | 13[96]15[95]P2    | TAGGTAACTATTTTTGAGAGATCAAACGTTA TTATCTACATA   |
| E6  | 11[96]13[95]P3    | AATGGTCAACAGGCAAGGCAAAGAGTAATGTG TTTCTTCATTA  |
| E7  | 9[96]11[95]P1     | CGAAAGACTTTGATAAGAGGTCATATTTTCGCA TTATACATCTA |
| E8  | 7[96]9[95]P2      | TAAGAGCAAATGTTTAGACTGGATAGGAAGCC TTATCTACATA  |
| E9  | 5[96]7[95]P3      | TCATTCAGATGCGATTTAAGAACAGGCATAG TTTCTTCATTA   |
| E10 | 3[96]5[95]P1      | ACACTCATCCATGTTACTTAGCCGAAAGCTGC TTATACATCTA  |
| E11 | 1[96]3[95]P2      | AAACAGCTTTTTCGCGGATCGTCAACACTAAA TTATCTACATA  |
| E12 | 0[111]1[95]BLK    | TAAATGAATTTTCTGTATGGGATTAATTTCTT              |
| F1  | 23[96]22[112]BLK  | CCCATTAGAGCTTGACGGGAAAAAGAATA                 |
| F2  | 22[111]20[112]P3  | GCCCGAGAGTCCACGCTGGTTTGCAGCTAACT TTTCTTCATTA  |
| F3  | 20[111]18[112]P1  | CACATTAATAATTGTTATCCGCTCATGCGGGCC TTATACATCTA |
| F4  | 18[111]16[112]P2  | TCTTCGCTGCACCGCTTCTGGTGCGGCCTTCC TTATCTACATA  |
| F5  | 16[111]14[112]P3  | TGTAGCCATTAATAATTCGCATTAATGCCGGA TTTCTTCATTA  |
| F6  | 14[111]12[112]P1  | GAGGGTAGGATTCAAAAGGGTGAGACATCCAA TTATACATCTA  |
| F7  | 12[111]10[112]P2  | TAAATCATATAACCTGTTTAGCTAACCTTTAA TTATCTACATA  |
| F8  | 10[111]8[112]P3   | TTGCTCCTTTCAAAATATCGCGTTTGAGGGGGT TTTCTTCATTA |
| F9  | 8[111]6[112]P1    | AATAGTAAACACTATCATAACCCCTCATGTGA TTATACATCTA  |
| F10 | 6[111]4[112]P2    | ATTACCTTTGAATAAGGCTTGCCCAAATCCGC TTATCTACATA  |
| F11 | 4[111]2[112]P3    | GACCTGCTCTTTGACCCCCAGCGAGGGAGTTA TTTCTTCATTA  |
| F12 | 2[111]0[112]BLK   | AAGGCCGCTGATACCGATAGTTGCGACGTTAG              |
| G1  | 21[120]23[127]BLK | CCCAGCAGGCGAAAAATCCCTTATAAATCAAGCCGGC         |
| G2  |                   |                                               |
| G3  |                   |                                               |
| G4  | 15[128]18[128]BLK | TAAATCAAAATAATTCGCTCTCGGAAACCAGGCAAAGGAAGG    |
| G5  | 13[128]15[127]P2  | GAGACAGCTAGCTGATAAATTAATTTTTGT TTATCTACATA    |
| G6  | 11[128]13[127]P3  | TTTGGGATAGTAGTAGCATTAAAAGGCCG TTTCTTCATTA     |
| G7  | 9[128]11[127]P1   | GCTTCAATCAGGATTAGAGAGTTATTTTCA TTATACATCTA    |
| G8  | 7[120]9[127]BLK   | CGTTTACCAGACGACAAAGAAGTTTTGCCATAATTCGA        |
| G9  |                   |                                               |
| G10 |                   |                                               |
| G11 | 1[128]4[128]BLK   | TGACAACCTGCTGAGGCTTGCAATTATACCAAGCGGATGATAAA  |
| G12 | 0[143]1[127]BLK   | TCTAAAGTTTTGTGCTCTTTCCAGCCGACAA               |

|     |                   |                                                    |
|-----|-------------------|----------------------------------------------------|
| H1  | 21[160]22[144]P3  | TCAATATCGAACCTCAAATATCAATTCCGAAA TTTCTTCATTA       |
| H2  | 19[160]20[144]P3  | GCAATTCACATATTCTGATTATCAAAGTGTA TTTCTTCATTA        |
| H3  | 17[160]18[144]P2  | AGAAAACAAAAGAAGATGATGAAACAGGCTGCG TTATCTACATA      |
| H4  | 15[160]16[144]P3  | ATCGCAAGTATGTAAATGCTGATGATAGGAAC TTTCTTCATTA       |
| H5  | 13[160]14[144]P3  | GTAATAAGTTAGGCAGAGGCATTTATGATATT TTTCTTCATTA       |
| H6  | 11[160]12[144]P2  | CCAATAGCTCATCGTAGGAATCATGGCATCAA TTATCTACATA       |
| H7  | 9[160]10[144]P3   | AGAGAGAAAAAATGAAAATAGCAAGCAAAC TTTCTTCATTA         |
| H8  | 7[160]8[144]P3    | TTATTACGAAGAACTGGCATGATTGCGAGAGG TTTCTTCATTA       |
| H9  | 5[160]6[144]P2    | GCAAGGCCTCACCAGTAGCACCATGGGCTTGA TTATCTACATA       |
| H10 | 3[160]4[144]P3    | TTGACAGGCCACCACCAGACCGCGATTTGTA TTTCTTCATTA        |
| H11 | 1[160]2[144]P3    | TTAGGATTGGCTGAGACTCCTCAATAACCGAT TTTCTTCATTA       |
| H12 | 0[175]0[144]BLK   | TCCACAGACAGCCCTCATAGTTAGCGTAACGA                   |
| A1  | 23[128]23[159]BLK | AACGTGGCGAGAAAGGAAGGGAAACCAGTAA                    |
| A2  | 22[143]21[159]P1  | TCGGCAAATCCTGTTTGATGGTGGACCCTCAA TTATACATCTA       |
| A3  | 20[143]19[159]P2  | AAGCCTGGTACGAGCCGGAAGCATAGATGATG TTATCTACATA       |
| A4  | 18[143]17[159]P1  | CAACTGTTGCGCCATTCGCCATTCAAACATCA TTATACATCTA       |
| A5  | 16[143]15[159]P1  | GCCATCAAGCTCATTTTTTAACCACAAATCCA TTATACATCTA       |
| A6  | 14[143]13[159]P2  | CAACCGTTTCAAATCACCATCAATTCGAGCCA TTATCTACATA       |
| A7  | 12[143]11[159]P1  | TTCTACTACGCGAGCTGAAAAGGTTACCGCGC TTATACATCTA       |
| A8  | 10[143]9[159]P1   | CCAACAGGAGCGAACCAGACCGGAGCCTTAC TTATACATCTA        |
| A9  | 8[143]7[159]P2    | CTTTTGCAGATAAAAACCAAATAAAGACTCC TTATCTACATA        |
| A10 | 6[143]5[159]P1    | GATGGTTGAACGAGTAGTAAATTTACCATTA TTATACATCTA        |
| A11 | 4[143]3[159]P1    | TCATCGCCAACAAAGTACAACGGACGCCAGCA TTATACATCTA       |
| A12 | 2[143]1[159]P2    | ATATTCGGAACCATCGCCACGCAGAGAAGGA TTATCTACATA        |
| B1  | 23[160]22[176]BLK | TAAAAGGGACATTCTGGCCAACAAAGCATC                     |
| B2  | 22[175]20[176]P3  | ACCTTGCTTGGTCAGTTGGCAAAGAGCGGA TTTCTTCATTA         |
| B3  | 20[175]18[176]P1  | ATTATCATTCATATAATCCTGACAATTAC TTATACATCTA          |
| B4  | 18[175]16[176]P2  | CTGAGCAAAAATTAATTACATTTTGGGTTA TTATCTACATA         |
| B5  | 16[175]14[176]P3  | TATAACTAACAAAGAACGCGAGAACGCCAA TTTCTTCATTA         |
| B6  | 14[175]12[176]P1  | CATGTAATAGAATATAAAGTACCAAGCCGT TTATACATCTA         |
| B7  | 12[175]10[176]P2  | TTTTATTTAAGCAAATCAGATATTTTTTGT TTATCTACATA         |
| B8  | 10[175]8[176]P3   | TTAACGTCTAACATAAAAAACAGGTAACGGA TTTCTTCATTA        |
| B9  | 8[175]6[176]P1    | ATACCCAACAGTATGTTAGCAAATTAGAGC TTATACATCTA         |
| B10 | 6[175]4[176]P2    | CAGCAAAGGAAACGTCACCAATGAGCCGC TTATCTACATA          |
| B11 | 4[175]2[176]P3    | CACCAGAAAGGTTGAGGCAGGTCATGAAAG TTTCTTCATTA         |
| B12 | 2[175]0[176]BLK   | TATTAAGAAGCGGGTTTTGCTCGTAGCAT                      |
| C1  | 21[184]23[191]BLK | TCAACAGTTGAAAGGAGCAAATGAAAAATCTAGAGATAGA           |
| C2  |                   |                                                    |
| C3  |                   |                                                    |
| C4  | 15[192]18[192]BLK | TCAAATATAACCTCCGGCTTAGGTAACAATTTTCAATTTGAAGGCGAATT |
| C5  | 13[192]15[191]P1  | GTAAGTAATCGCCATATTTAACAAAACTTTT TTATACATCTA        |

|     |                   |                                                  |
|-----|-------------------|--------------------------------------------------|
| C6  | 11[192]13[191]P2  | TATCCGGTCTCATCGAGAACAAGCGACAAAAG TTATCTACATA     |
| C7  | 9[192]11[191]P1   | TTAGACGGCCAAATAAGAAACGATAGAAGGCT TTATACATCTA     |
| C8  | 7[184]9[191]BLK   | CGTAGAAAATACATACCGAGGAAACGCAATAAGAAGCGCA         |
| C9  |                   |                                                  |
| C10 |                   |                                                  |
| C11 | 1[192]4[192]BLK   | GCGGATAACCTATTATTCTGAAACAGACGATTGGCCTTGAAGAGCCAC |
| C12 | 0[207]1[191]BLK   | TCACCAGTACAAACTACAACGCCTAGTACCAG                 |
| D1  | 23[192]22[208]BLK | ACCCTTCTGACCTGAAAGCGTAAGACGCTGAG                 |
| D2  | 22[207]20[208]P2  | AGCCAGCAATTGAGGAAGGTTATCATCATTTT TTATCTACATA     |
| D3  | 20[207]18[208]P3  | GCGGAACATCTGAATAATGGAAGGTACAAAAT TTTCTTCATTA     |
| D4  | 18[207]16[208]P1  | CGCGCAGATTACCTTTTTTAATGGGAGAGACT TTATACATCTA     |
| D5  | 16[207]14[208]P2  | ACCTTTTTATTTTAGTTAATTTTCATAGGGCTT TTATCTACATA    |
| D6  | 14[207]12[208]P3  | AATTGAGAATTCTGTCCAGACGACTAAACCAA TTTCTTCATTA     |
| D7  | 12[207]10[208]P1  | GTACCGCAATTCTAAGAACGCGAGTATTATTT TTATACATCTA     |
| D8  | 10[207]8[208]P2   | ATCCCAATGAGAATTAAGTGAACAGTTACCAG TTATCTACATA     |
| D9  | 8[207]6[208]P3    | AAGGAAACATAAAGGTGGCAACATTATCACCG TTTCTTCATTA     |
| D10 | 6[207]4[208]P1    | TCACCGACGCACCGTAATCAGTAGCAGAACCG TTATACATCTA     |
| D11 | 4[207]2[208]P2    | CCACCTCTATTACAAAACAAATACCTGCCTA TTATCTACATA      |
| D12 | 2[207]0[208]BLK   | TTTCGGAAGTGCCGTCGAGAGGGTGAGTTTCG                 |
| E1  | 21[224]23[223]BLK | CTTTAGGGCCTGCAACAGTGCCAATACGTG                   |
| E2  | 19[224]21[223]P1  | CTACCATAGTTTGAGTAACATTTAAAATAT TTATACATCTA       |
| E3  | 17[224]19[223]P2  | CATAAATCTTTGAATACCAAGTGTTAGAAC TTATCTACATA       |
| E4  | 15[224]17[223]P3  | CCTAAATCAAATCATAGGTCTAACAGTA TTTCTTCATTA         |
| E5  | 13[224]15[223]P1  | ACAACATGCCAACGCTCAACAGTCTTCTGA TTATACATCTA       |
| E6  | 11[224]13[223]P2  | GCGAACCTCCAAGAACGGGTATGACAATAA TTATCTACATA       |
| E7  | 9[224]11[223]P3   | AAAGTCACAAAATAAACAGCCAGCGTTTTA TTTCTTCATTA       |
| E8  | 7[224]9[223]P1    | AACGCAAAGATAGCCGAACAAACCCTGAAC TTATACATCTA       |
| E9  | 5[224]7[223]P2    | TCAAGTTTCATTAAAGGTGAATATAAAAAGA TTATCTACATA      |
| E10 | 3[224]5[223]P3    | TTAAAGCCAGAGCCGCCACCCTCGACAGAA TTTCTTCATTA       |
| E11 | 1[224]3[223]P1    | GTATAGCAAACAGTTAATGCCAATCCTCA TTATACATCTA        |
| E12 | 0[239]1[223]BLK   | AGGAACCCATGTACCGTAACACTTGATATAA                  |
| F1  | 23[224]22[240]BLK | GCACAGACAATATTTTTGAATGGGGTCAGTA                  |
| F2  | 22[239]20[240]P2  | TTAACACCAGCACTAACAATAATCGTTATTA TTATCTACATA      |
| F3  | 20[239]18[240]P3  | ATTTTAAAATCAAATTTATTTGCACGGATTCG TTTCTTCATTA     |
| F4  | 18[239]16[240]P1  | CCTGATTGCAATATATGTGAGTGATCAATAGT TTATACATCTA     |
| F5  | 16[239]14[240]P2  | GAATTTATTTAATGGTTTGAAATATTCTTACC TTATCTACATA     |
| F6  | 14[239]12[240]P3  | AGTATAAAGTTCAGCTAATGCAGATGTCTTTC TTTCTTCATTA     |
| F7  | 12[239]10[240]P1  | CTTATCATTTCCGACTTGGGGAGCCTAATTT TTATACATCTA      |
| F8  | 10[239]8[240]P2   | GCCAGTTAGAGGGTAATGAGCGCTTTAAGAA TTATCTACATA      |
| F9  | 8[239]6[240]P3    | AAGTAAGCAGACACCACGGAATAATATTGACG TTTCTTCATTA     |
| F10 | 6[239]4[240]P1    | GAAATTATTGCCTTTAGCGTCAGACCGGAACC TTATACATCTA     |

|     |                       |                                                   |
|-----|-----------------------|---------------------------------------------------|
| F11 | 4 [239] 2 [240] P2    | GCCTCCCTCAGAATGGAAAGCGCAGTAACAGT TTATCTACATA      |
| F12 | 2 [239] 0 [240] BLK   | GCCCGTATCCGGAATAGGTGTATCAGCCCAAT                  |
| G1  | 21 [248] 23 [255] BLK | AGATTAGAGCCGTCAAAAAACAGAGGTGAGGCCTATTAGT          |
| G2  |                       |                                                   |
| G3  |                       |                                                   |
| G4  | 15 [256] 18 [256] BLK | GTGATAAAAAGACGCTGAGAAGAGATAACCTTGCTTCTGTTTCGGGAGA |
| G5  | 13 [256] 15 [255] P1  | GTTTATCAATATGCGTTATACAAACCGACCGT TTATACATCTA      |
| G6  | 11 [256] 13 [255] P2  | GCCTTAAACCAATCAATAATCGGCACGCGCCT TTATCTACATA      |
| G7  | 9 [256] 11 [255] P3   | GAGAGATAGAGCGTCTTTCCAGAGGTTTTGAA TTTCTTCATTA      |
| G8  | 7 [248] 9 [255] BLK   | GTTTATTTGTCACAATCTTACCGAAGCCCTTAAATATCA           |
| G9  |                       |                                                   |
| G10 |                       |                                                   |
| G11 | 1 [256] 4 [256] BLK   | CAGGAGGTGGGGTCAGTGCCTTGAGTCTCTGAATTTACCGGAACCAG   |
| G12 | 0 [271] 1 [255] BLK   | CCACCCTCATTTTCAGGGATAGCAACCGTACT                  |
| H1  | 23 [256] 22 [272] BLK | CTTTAATGCGCGAAGTATAGCCCCACCAG                     |
| H2  | 22 [271] 20 [272] BLK | CAGAAGATTAGATAATACATTTGTTCGACAA                   |
| H3  | 20 [271] 18 [272] P3  | CTCGTATTAGAAATTGCGTAGATACAGTAC TTTCTTCATTA        |
| H4  | 18 [271] 16 [272] P1  | CTTTTACAAAATCGTCGCTATTAGCGATAG TTATACATCTA        |
| H5  | 16 [271] 14 [272] P2  | CTTAGATTTAAGGCGTTAAATAAAGCCTGT TTATCTACATA        |
| H6  | 14 [271] 12 [272] P3  | TTAGTATCACAATAGATAAGTCCACGAGCA TTTCTTCATTA        |
| H7  | 12 [271] 10 [272] P1  | TGTAGAAATCAAGATTAGTTGCTCTTACCA TTATACATCTA        |
| H8  | 10 [271] 8 [272] P2   | ACGCTAACACCCACAAGAATTGAAAATAGC TTATCTACATA        |
| H9  | 8 [271] 6 [272] P3    | AATAGCTATCAATAGAAAATTCAACATTCA TTTCTTCATTA        |
| H10 | 6 [271] 4 [272] P1    | ACCGATTGTCGGCATTTCGGTCATAATCA TTATACATCTA         |
| H11 | 4 [271] 2 [272] P2    | AAATCACCTTCCAGTAAGCGTCAGTAATAA TTATCTACATA        |
| H12 | 2 [271] 0 [272] BLK   | GTTTTAACTTAGTACCGCCACCCAGAGCCA                    |

**Supplementary Table 10 | Barcode IDs and combinations of frequencies to achieve 124 colors**

| Barcode ID | Red (P1 handle) | Green (P2 handle) | Blue (P3 handle) |
|------------|-----------------|-------------------|------------------|
| 0          | 0               | 0                 | 0                |
| 1          | 0               | 0                 | 3                |
| 2          | 0               | 0                 | 9                |
| 3          | 0               | 0                 | 22               |
| 4          | 0               | 0                 | 44               |
| 5          | 0               | 3                 | 0                |
| 6          | 0               | 3                 | 3                |
| 7          | 0               | 3                 | 9                |
| 8          | 0               | 3                 | 22               |
| 9          | 0               | 3                 | 44               |
| 10         | 0               | 9                 | 0                |
| 11         | 0               | 9                 | 3                |
| 12         | 0               | 9                 | 9                |
| 13         | 0               | 9                 | 22               |
| 14         | 0               | 9                 | 44               |
| 15         | 0               | 22                | 0                |
| 16         | 0               | 22                | 3                |
| 17         | 0               | 22                | 9                |



|    |    |    |    |
|----|----|----|----|
| 18 | 0  | 22 | 22 |
| 19 | 0  | 22 | 44 |
| 20 | 0  | 44 | 0  |
| 21 | 0  | 44 | 3  |
| 22 | 0  | 44 | 9  |
| 23 | 0  | 44 | 22 |
| 24 | 0  | 44 | 44 |
| 25 | 3  | 0  | 0  |
| 26 | 3  | 0  | 3  |
| 27 | 3  | 0  | 9  |
| 28 | 3  | 0  | 22 |
| 29 | 3  | 0  | 44 |
| 30 | 3  | 3  | 0  |
| 31 | 3  | 3  | 3  |
| 32 | 3  | 3  | 9  |
| 33 | 3  | 3  | 22 |
| 34 | 3  | 3  | 44 |
| 35 | 3  | 9  | 0  |
| 36 | 3  | 9  | 3  |
| 37 | 3  | 9  | 9  |
| 38 | 3  | 9  | 22 |
| 39 | 3  | 9  | 44 |
| 40 | 3  | 22 | 0  |
| 41 | 3  | 22 | 3  |
| 42 | 3  | 22 | 9  |
| 43 | 3  | 22 | 22 |
| 44 | 3  | 22 | 44 |
| 45 | 3  | 44 | 0  |
| 46 | 3  | 44 | 3  |
| 47 | 3  | 44 | 9  |
| 48 | 3  | 44 | 22 |
| 49 | 3  | 44 | 44 |
| 50 | 9  | 0  | 0  |
| 51 | 9  | 0  | 3  |
| 52 | 9  | 0  | 9  |
| 53 | 9  | 0  | 22 |
| 54 | 9  | 0  | 44 |
| 55 | 9  | 3  | 0  |
| 56 | 9  | 3  | 3  |
| 57 | 9  | 3  | 9  |
| 58 | 9  | 3  | 22 |
| 59 | 9  | 3  | 44 |
| 60 | 9  | 9  | 0  |
| 61 | 9  | 9  | 3  |
| 62 | 9  | 9  | 9  |
| 63 | 9  | 9  | 22 |
| 64 | 9  | 9  | 44 |
| 65 | 9  | 22 | 0  |
| 66 | 9  | 22 | 3  |
| 67 | 9  | 22 | 9  |
| 68 | 9  | 22 | 22 |
| 69 | 9  | 22 | 44 |
| 70 | 9  | 44 | 0  |
| 71 | 9  | 44 | 3  |
| 72 | 9  | 44 | 9  |
| 73 | 9  | 44 | 22 |
| 74 | 9  | 44 | 44 |
| 75 | 22 | 0  | 0  |
| 76 | 22 | 0  | 3  |
| 77 | 22 | 0  | 9  |
| 78 | 22 | 0  | 22 |
| 79 | 22 | 0  | 44 |
| 80 | 22 | 3  | 0  |
| 81 | 22 | 3  | 3  |
| 82 | 22 | 3  | 9  |
| 83 | 22 | 3  | 22 |
| 84 | 22 | 3  | 44 |

|     |    |    |    |
|-----|----|----|----|
| 85  | 22 | 9  | 0  |
| 86  | 22 | 9  | 3  |
| 87  | 22 | 9  | 9  |
| 88  | 22 | 9  | 22 |
| 89  | 22 | 9  | 44 |
| 90  | 22 | 22 | 0  |
| 91  | 22 | 22 | 3  |
| 92  | 22 | 22 | 9  |
| 93  | 22 | 22 | 22 |
| 94  | 22 | 22 | 44 |
| 95  | 22 | 44 | 0  |
| 96  | 22 | 44 | 3  |
| 97  | 22 | 44 | 9  |
| 98  | 22 | 44 | 22 |
| 99  | 22 | 44 | 44 |
| 100 | 44 | 0  | 0  |
| 101 | 44 | 0  | 3  |
| 102 | 44 | 0  | 9  |
| 103 | 44 | 0  | 22 |
| 104 | 44 | 0  | 44 |
| 105 | 44 | 3  | 0  |
| 106 | 44 | 3  | 3  |
| 107 | 44 | 3  | 9  |
| 108 | 44 | 3  | 22 |
| 109 | 44 | 3  | 44 |
| 110 | 44 | 9  | 0  |
| 111 | 44 | 9  | 3  |
| 112 | 44 | 9  | 9  |
| 113 | 44 | 9  | 22 |
| 114 | 44 | 9  | 44 |
| 115 | 44 | 22 | 0  |
| 116 | 44 | 22 | 3  |
| 117 | 44 | 22 | 9  |
| 118 | 44 | 22 | 22 |
| 119 | 44 | 22 | 44 |
| 120 | 44 | 44 | 0  |
| 121 | 44 | 44 | 3  |
| 122 | 44 | 44 | 9  |
| 123 | 44 | 44 | 22 |
| 124 | 44 | 44 | 44 |

### Supplementary Note 1: Design of rectangular DNA origami

The DNA origami we used for the 40 and 120 binding site experiments was based on the original flat, rectangular structure<sup>7</sup>. For both the 40 and 120 binding sites, the same core staples were used, and the same 40 staples were modified in the case of all four species. All DNA-PAINT handle extensions added to the staple strands can be found in **Supplementary Tables 3 and 4**. We used the same basic structure for the 124 barcoded origami species as well.

### Supplementary Note 2: RNA-FISH probe design

To the 3'-end of the probe's complementary region we added either a P3+ meta-stable handle sequence (in the case of MKI67) or a P3+ and a P1+ meta-stable handle sequence (in the case of TFRC)<sup>8</sup>. By hybridizing meta-stable imager strands to these handles we were able to identify favorable planes in the cell and could also use the acquired diffraction limited signals as an initial control to overlay with the subsequently acquired DNA-PAINT data.

| Name               | Sequence                                        |
|--------------------|-------------------------------------------------|
| MKI67_P3Plus_120_1 | probe-TT-TCTTCATTAGCG-TT-TCTTCATTA-TT-TCTTCATTA |
| TFRC-P3+_P1+_40-1  | probe-TT-TCTTCATTAGCG-TT-TT-ATACATCTACGG        |

In the case of MKI67 probes, the complementary region to the mRNA is in small letters, followed by a P3+ meta-stable handle (12 bp) and two P3 transient DNA-PAINT handle sequences (9bp) at the 3' end. The TFRC probes are elongated on

the 3' end with a P3+ meta-stable handle (12 bp) and a P1+ meta-stable handle (12bp). The handle sequences are separated from each other by thymine (T) spacers. (See **Supplementary Table 5** and **6** for all probes).

### Supplementary Note 3: Sequence of MKI67 mRNA variant 2 used for probe design, 11427 bp

TACCGGGCGGAGGTGAGCGGGCGCGGCTCCTCTCGCGGGACTTTGGGTGCGACTTGACGAGCGGTGGTTTCGACAAGTGGCCTTGCGGGCGGATCGTCCAGTGGAAAG  
AGTTGTAAATTTGCTTCTGGCCCTCCCTACGGATTATACCTGGCCCTCCCTACGGATTATACCTCAACTTACTGTTTAGAAAATGTGGCCACGAGACGCGTGGTTACTAT  
CAAAAGGAGCGGGGTGCGAGCTCCCACTTTCCCTGAGCCTCAGCACCCTGCTGTTTGGAAAGGGGTATGAATGTGACATCCCGTATCCAGCTTCTGTGTCAAAAACAA  
CATTTGAAAATGAAATGAAATGAGCAGGAGGCAATATACATATTTAGTTCACAAATCCAAACAAAGTAAATGGGTCTGTTATTGATGAGCCTGACGGTAAAACATG  
GAGATGTAATAACTATTATTGATCGTTCCTTCAGGTATGAAAATGAAAGTCTTCAGAAATGGAAGGAAGTCAACTGAATTTCCAAGAAAATACGTGAACAGGAGCCAGCACG  
TCGTGTCTCAAGATCTAGCTTCTTCTGACCTGATGAGAGTGGAGGAATACCTTTGAAAAGAAGGCGTGTCTCTTTGGTGGGCACCTAAGACCTGAACATATTTGATGAA  
AACTTGCCTCTAATACGCCTCTCAAAAGGGGAGAAGCCCCAACAAAAGAAAGTCTCTGGTAATGCACACTCCACCTGTCTGAAGAAAATCATCAAGGAACAGCCTCAAC  
CATCAGGAAAACAAAGAGTCAAGTTCAGAAAATCCATGTGGAAGTGAAGGCACAAAGCTTGGTTATAAGCCCTCCAGCTCTTAGTCTTAGGAAAACCTCCAGTTGCCAGTATCA  
ACGCCGTAGGTCTGCAAAACAGCCCTGCTTCCAGCAGCAATCTCAGACAGAGGTTCTTAAGAGAGGGAGAAAGAGTGGCAACCTGCCTTCAAGAGAGTGTCTATC  
AGCCGAAGTCAACATGATATTTTACAGATGATATGTTCCAAAAGAAGAGTGTGCTTCGGAAGCAATCTGATGTTGCAAAAATCATGGGCAGATGTAGTAAAACCTGGT  
TAGTACAGGCCACGCAAACTCTCTTGTACCATATAAATAGGGAAAGCTCATACTGAAAAGTACATGTGCCTGTCTGACCTTACAGAGTGTCAACAACCTCATTTCACAC  
CAAAAATGGACTTTAAGGAAGATCTTTTCAGGAATAGCTGAAATGTTCAAGACCCAGTGAAGGAGCAACCGCAGTTGACAAGCACATGTACATCGTATTTCAAATTCAG  
AGAATTTGCTTGGAAAACAGTTTCAAGGAACGATTCAGGAGAAGAACCCTCTGCTCCCACTCAGAGAGTTTGGAGGAAATGTGTTCTTCAAGTGCACAGAAATCGAGCAAA  
ACAGCCTCTGATAAATGCTCTGCAAGCCCTCCCTTAAGACCGCAGTGTATTAGAGAAAATGGAAAACCTAGCAAAAACGCCCAGAACACTCAAAAATGACTTCTCTGGAG  
ACAAAACCTCAGATACTGAGACAGAGCCTTCAAAAACAGTATCCACTGCAACAGGTCAGGAAGGTTACAGAGTTCAGGAATATACAGAAGCTACCTGTGGAAAGTAAAG  
GTGAAGAAAACAAATACAGAAAATGTTGAGTGCATCTTAAAAGAGGTCAGAAAGCAACACTACTACAACAAGGAGAGAAAGGAGAGATGAAGGAAAATGAAAGACCTTTTGA  
GACATAAAGGAAAATATTGAATTAAGAAGAAAACGATGAAAAGATGAAAGCAATGAAGAGATCAAGAACTGGGGGCAGAAAATGTGCACCAATGTCTGACCTGACAGACCTC  
AAGACTTTGCCCTGATACAGAACTCATGAAAAGCACGGCAGCTGCCCAGAAATCTCTCAAAACCAAGATCATGCCAAGGCACAAAGAGTGAAGAAAGCAAAATCATAAA  
TGCCCTGCCAGTCAATTACAACCAAGAACATAAAACACCCCAACACACACAAAACAACAGTTGAAGGCATCCCTGGGAAAAGTAGGTGTGAAGAAGAGCTCTAGCAGTCCG  
CAAGTTACACAGGACCTCAGGGGAGACACGCACAGCAGAGAGCCAGCAGGAGATGGCAAGAGCATCAGAACGTTAAGGAGTCTCAAAAGCAGATCTCGACCCAGCAG  
GCCCGTGAACCTGGAATGAAGAAGTGGCCAAAGAAGCCCTAAGGAAGAGGCCAGTCACTAGAAGACCTGGCTGGCTTCAAAGAGCTCTTCCAGACACAGGTCCTCTGAGG  
AATCAATGACTGATGAGAAAACCTACAAAATAGCCTGCAAAATCTCCACCCAGAACTCAGTGGACACTCCAACAAGCAAAAGCAATGGCCCTAAGAGAACTCAGGAAAAGC  
AGATGTAGAGGAAGAATCTTAGCACTCAGGAACTAACCCATCAGCAGGGAAGCCATGCTTACGCCCAAAACAGCAGGAGGTGATGAGAAAGACATTAAGCATTTATG  
GAACTCCAGTGCAGAACTGGACCTGGCAGGAATTTTACCTGGCAGAAAAGACAGCTACAGACTCTTAAGAAAAGGCCAGGCTTAGAAGACTTGGCTGGCTTTAAAG  
AGCTTTCCAGACTCTGGTCAACCCAGGAAATAGTGGCTGTGGTAAAACACTAAAATCCCTGGACTCTCCACAGTCAGACCAGTGGACACCCCAACAGCACAAA  
GCAAAGCAACAGAGAAGTATCAGGAAAGCAGATGTAGAGGGAGAATCTTAGCGTGCAGGAATCTAATGCCATCAGCAGGCAAGGCCATGCACAGCCCTAAACCTCAGTA  
GGTGAAGAGAAAGACATCATATTTGTTGGAACTCCAGTGCAGAACTGGACCTGACAGAGAACTTAACCGGCAGCAAGAGACGGCCCAAACTCCTAAGGAAGAGGCC  
AGGCTCTGGAAGACCTGACTGGCTTTAAAGAGCTCTTCCAGACCCCTGGTCACTACTGAAAGAAGCAGTGGCTGTGGCAAAACTACTAAAATGCCCTGCGAATCTTCTCCAC  
AGATCAGCAGACCAACCAAGCAGCAAGAGCCCAAGACACCTTTGGAGAAAAGGAGCTTCCAGGAGGCTCTCAGCCCTGAAGAAGACTCAGACATCAACAGACAGG  
GAAACACACACACAGATAAAGTACCAGGAGGTGAGGATAAAGCATCAACCGCTTTAGGAAAAGTGCAAAACAGAACTGGACCCAGCAGCAAGTGAACCTGGTAGCAAGA  
GGCACCCAAAACCTAAGGAAAAGGCCAACCCCTAGAAGACCTGGCTGGCTTGAAGAGCTCTTCCAGACACAGTATGCACCTGACAGGCCACGACTCACAGAAAACCTAC  
CAAAATAGCCTGCGATCACAACCCAGCCAGTGGACACACAAAGCTCCAAGCCACAGTCCAAGAGAAGTCTCAGGAAAAGTGGACGTAGAAGAAGAAATTTCTGCACT  
AGGAAAACGAACACACTCAGCAGGCAAGCCATGCACACACCCAAACCCAGCAGTAAAGTGGTGAGAAAACACTCTACGCATTTATGGAACTCCAGTGCAGAAAATCGA  
CAGAGAACTTAACCTGGCAGCAAGAGACGGCTACAAACTCTAAGGAAAAGGCCAGGCTCTAGAAGACTGGCTGGCTTTAAAGAGCTCTTCCAGACACGAGGTACACTGA  
GGAACTCAATGACTAACGATAAACTGCCAAAGTAGCTGCAAACTCTTCAACCCAGACCCAGACAAAACCCAGCAAGCTCCAAGCGACGGCTCAAGACATCCCTGGGAAA  
GTGGGCGTGAAGAAGAGCTCTCAGACTTGGCAAGCTCACACAGACACTCAGGAGAGACTACACACACACAGAGCCAAACAGGAGATGGTAAGAGCATGAAAGCATTTA  
TGGAGCTCCAAAGCAGACTCTTAGACTCAGAACGAGCTTAACCTGGCAGCAACTGCATGATAACCCAGCAGTGTAGAAAACCTACAAAAGAAATTAATCTGCAAACTCCGCAA  
CGAGCTCTTCCAGACCAAGTCACTAAGGAATCAATGACTAACGAAAACCTACCAAAGTATCTTACAGAGCTTCCAGCCAGACCTAGTGGACACCCCAACAGCTCC  
AAGCCACAGCCAAAGAGAAGTCTCAGGAAAGCAGACACTGAAGAAGAAATTTTAGCATTTAGGAAAACAAACCGCATCAGCAGGCAAGCCATGCACACACCCAAACAGCAG  
TAGGTGAAGAAAAGACATCAACACTGTTTGGGAATCTCCAGTGCAGAACTGGACCCAGGAAATTTACCTGGCAGCAATAGACGGCTACAACCTCGTAAGGAAAAGGC  
CAGGCTCTAGAAGAACTGACTGGCTTCCAGAGCTTTCAGACAGCTTCCAGACACACTGCATGATAACCCAGCAGTGTAGAAAACCTACAAAAGAAATTAATCTGCAAACTCCGCAA  
TCAGACCAGCGACACCCCAACAAACAAAGCAACGGCCAAAGAGAAGCTCAAGAAGCAGACGTAGAGGAAGAAATTTTAGCATTCAGGAACTAACACCATCAGCAG  
GCAAAGCACTGCACACCGCTAAAGCAGCAGTAGGTGAGAGAAAGACATCAACACATTTGGGGGACTCCAGTGGGAAAACCTGGACCTGTAGGAAATTTACTTGGCAGCAA  
GAGACGGCCAAAACCTCAAAGAAAAGCCAAAGCTTAGAAGATCTGGCTGGCTTCAAAGAGCTCTCCAGACACAGGTCACTGAGGAAATCAATGACCGATCAAGCAAA  
ATCACAGAAGTATCTTGCAAACTCCACAACCCAGACCCAGTCAAAAACCCAAACAGCTCCAAGCAACGACTCAAGATATCTTGGGAAAAGTAGGTGTGAAGAAGAGGTCC  
TACCAGTCCGCAAGCTCACACAGACGTAGGGAAGACCACACAGACACACAGAGACAGCAGGAGATGGAAGAGCATCAAAAGCTTTAAGGAATCTGCAAAAGCAGATGCT  
GGACCCAGCAAACTATGGAACCTGGATGGAGAGTGGCCAAAGAACCTTAAGGAAGAGGCCAAATCACTAGAAGACCTGGCCGGCTCAAAGAGCTTCCAGACACCCAGC  
CACTAGGAAATCAACACTGATGACAAAATACCAAATAGCCTCAAACTCCAGCACCAGACTCAAGTGCACACTCCAAGCAAGCAGTCAAGTAAAGAGCCGCCCAGAACTCT  
TGGGAAAAGGGATATAGTGAAGAGCTCTCAGCCCTGAAGCAGCTCACACAGACCACACACAGACAAAAGTACCAGGAGATGAGGATAAAGGCATCAACGTTGTCAGGGA  
AAGTGCAAAACAGAACTGGACCCAGCAGCAAGTGTAACTGGTAGCAAGAGGAGCCAAAGAACTCTAAGGAAAAGGCCAAACCCCTAGAAGACTGGCTGGCTTGAAGAG  
CTCTTCCAGACCAAAATGCACTGCAAGCCAGACTCATGAGAAAATACCAAATAGCTGCAGATCTCCACAAACCCAGACCCAGTGGGTACCCCAACAACTTCAAGC  
CAGACTCAAGAGAAGTCTCAGGAAAAGCAGACTGAGGAAAGAAATCTTAGCCTCAGGAAAAGCAACCATCAGTAGGAAAAGCTTAGGACACCCCAACCCAGCAGGAGG  
TGATGAGAAAAGACATGAAAGCATTATGGAACTCCAGTGCAGAAATGGACCTGCCAGGAAATTTACCTGGCAGCAAAAGATGGCCACAACCTCTAAGGAAAAGGCCAG  
GCTTAGAAGACTGGCTGGCTTCAAAGAGCTCTTCCAGACACCCAGCAGTCAAGAGCCCAAGCTCAGTGAAGAAAACCTACAAAATAGCCTGCAAACTCCACAACCCAGAC  
CAGTGGACACCCAGCAAGCAGCAAGCAGCGCCAAAGAAAACCTCAGGAAGCAGCAGTGAAGGAAGAAATTTTAGCCTCAGGAAACCAAGCAACCATCAGCAGGCAAGC  
CATGGACACCCAAACCCAGCAGTAAAGTGTAGAAAATAATCAACACATTTGTGAAAATCCAGTGCAGAAACTGACCTGTAGGAAATTTACTGGCAGCAAGAGACAG  
CCACAGACTCTAAGGAAAAGGCTGAGGCTCTAGAGGACTGGTTGGCTTCAAAGAACTCTTCCAGACACCCAGGTCACTGAGGAAATCAATGACTGATGACAAAATCACAG  
AAGTATCTGTAATCTCCACAGCCAGAGTCAATCAAACCTCAAGAAGCTCAAGAAAGCTCAAGTATCCCTGGTGAAGGTGGACATGAAGAAGAGCCCTTAGCCAT  
CAGCAAGTGTAACTGGTAGCAGGAGGACTGAGAATCTGAAGGAAAAGGCCGCTGCTTAGAAGAACTGGTTGACTTCAAAGACTCTTCTCAGACCCAGGTCACTG  
AAGAGTCAATGACTATTGACAAAACCAAAAATTCCTGCAAACTCTCCCCACAGAACTAACAGACACTGCCAGCAGCACAAAGAGATGCCCAAGACAGTCCAGGAA  
AGAAGTAAAAGAGGAGCTCTCAGCAGTTGAGAGGCTCAGCAAACTCAGGGAAGGACACACACACAAAGAACAGCAAGGAGTGAAGAGGATCAAGATTTGAAG  
CAACGTGCAAAAGAAAAGAAACCAACCTAGTAGAAGAGGAAACCCAGCAGGAAAGGCAAGGACACTAAAGGAAAAGGCCCAACCCCTGGGAAAGCTGGCCGGCTTCAAGAGC  
TCTCTGAAAACATCAGGTCACACTCAGGAATCACTGACTGTGGCAAAGCCACTAAAATACCTGCGAATCTCCCCACTAGAAGTGGTAGACACCACAGCAAGCACAAGAG  
GCATCTCAGGACAGTGTGCAGAGGATCAAGTAAAAGAAAGCCCTCAGCAGTCAAGTTCACACAACACTAGGGGAAAACCCAGGATGCAGACAAAGAACAGCAGGTGAA  
GATAAAGGCATCAAGACTTGAAGAAATCTGCAAAAACAGACCCGGCTCCAGCAGTGAAGTGGCAGCAGGAGACGGCCAGAGCACCAGGAAAAGTGCACAAGCC  
TAGAAGACTAGCTGGCTTCAAAGAACTCAGCAGGCTCAGCTCAAGAACTCAATGACTGATGACAAAACCACTAAAATACCTGCAAACTCAGCAGAACTGCAAGACTC  
CGCAACAGCTCAAGAGACGGCCAGGACAGTGTCCAGAAAGTGAAGTGAAGGAGGAGCTGTAGCAGTTGGCAAGCTCACACAACTCAGGGGAGACCAGCACACC  
GACAAAGAGCCGTTAGTGGAGGCAAAAGGCAGAAAGCATTAAAGCAACCTGCAAGCGGAAAGCTGGACAGCAGAAAGTGAATTTGGCAGCAGGAGACGCAAGACCACTA

AGGAAAAGGCCAACCCCTGGAAGATCTGGCCAGCTTCCAAGAGCTCTCTCAAACACCAGGCCACTGAGGAAGTGGCAAAATGGTGTGCTGATAGCTTTACAGCGCTCC  
AAAGCAAACACCTGCAGCTGGAAGAACCTCTAAATAATCCAGAAAGAGTTCTTCGGGCCCTAAAGTAGAACCCGTGGGAGACCTGGTAAAGCACAGAGACCCTGTAATAATCA  
CAAGCAAAAGCAACACTTCCCTGCCCCACTGCCCTTCAAGAGGGAGGTGGCAAAAGATGGAAGCGTACCGGGAACCAAGAGCTGGCTGCATGCCAGCACAGAGGAAA  
TTGTGGAGGAGCTGCCAGCCAGCAAGAAGCAGAGGGTTGTCTCCAGGGCAAGAGGCAAAATCATCCGAACCCGTGGTCTCATGAAGAGAAGTTTGAGGACTTCTGCAAAAAG  
AATTTGAACCTGCGGAAGAGCTGAACAGCAACGCATGAAAACCAACAAAGAGGAAACAAATTTACAAGACTCGGTCCCTGAAAATAAGGGAATATCCCTGCGCTCCAGACGC  
CAAAAATAAGACTGAGGCAGAACAGCAATAACTGAGGCTTTTGTATTAGCAGAAAAGATAAGAAAATAAGAAAAGCCCATGAAGACCTCCCCAGAGATGGACA  
TTCAGAAATCCAGATGAGGAGCCGGAACCCATACCCTAGAGCAAAAGTACCTGAGAAACAAGGTTGAGGTTCTGTAGACAGAAATGAGAGACTCCAGACTCCAGACTTAAGTGGC  
AGAGGAGAGCGGAGGGCAGAAGAGTGCAGAGTTCTCATGCAGAAATCAGAAAGGGAAGGAGAAGCAGGAAATTCAGACTCCATGTGCTGAGATCAAGAAAGACAAAAGC  
CAGCCTGCAGCAAGCCTTTGGAGAGCAAAATCTGTGCAGAGAGTAACCGGGAGTGTCAAGAGTGTGCAGAAAATCCAAAGAAAGGCTGAGGACAATGTGTGTCAAGAAAA  
TAAGAACCAGAAGTCAATAGGACAGTGAAGATATTTGACAGAAAAATCGAAGTGGGAAAAATATAATAAAGTTAGTTTTGTGATAAGTTCTAGTGCAGTTTTTTGTCAATAA  
TACAAGTGAATTTCTGTAAGTAAGCGCTGCAGTCTGCTTAAGGGAAGAAAATTTGGATTTGCTGGGTCTGAATCGGCTTCAATAAACCTCCACTGGGAGCACTGCTGGGCTCT  
GGACTGAGAATAGTTGAACACCGGGGGCTTTGTGAGGAGTCTGGGCAAGGTTTGCCCTCAGCTTTTGCAAGATGAAGCCTTGAGGTTCTGTCACCACCCACAGCCACCCTAC  
AGCAGCCTTAACGTGACACTTGCACACTGTGTCTGCTGTTTTGTTGCTTCTCCAGGGCAGGTTGGCAGGAACAACATCTCTGCTGTCCCAACACTGAGCAGGCA  
CTCGGTAACACGAATGAATGGATGAGCGCAGCGATGAATGGAGTTACAAGATCTGTCTTTCCAATGGCCGGGGCATTTGGTCCCAAAATTAAGGCTATTGGACATCTGC  
ACAGGACAGTCTATTTTTGATGCTTTCTTCTTCTGAAAATAAAGTTTTGTCTTTGGAGAAATGACTGAGAGACATCTTTAGGGAACCAAGAGTACTTTCTGTAAGGAG  
TGACTCGTGGCTTTGCTTTGGTCTCTTTGGGAATACTTTTCTAACTAGGTTGTCTCACCTGAGACATTTCCACCCCGGGAATCTCAGGGTCCAGGCTGTGGCCATCAG  
ACCTCAAATGGCTCTTAATCTCCAGCTTTCTGTCTATTGAAAGCTTCGGAAGTTTACTGGCTGTGCTCCGCGCTGTTTTCTTTCTGACTCTATCTCAGCAGCCGATGCCAC  
CCAGTACAGGAAGTACACACAGTACTCTGTAAGCATCATCTTTGGAGATACTGAGCATTGAGCATTGAGCATTGAGCATTGAGCATTGAGCATTGAGCATTGAGCATTGAGC  
TCCGAAAATCTCTTTGAAAGCCAGACATCTTTCTCCAGCTTACAGCTTTGTAGATAATACTGTTTCTATCTTCAATTTAATTTTCCACTTTGCCCTTGTCTCTGTGTTCC  
AAATCAGAGAATAGCCCGCCATCCCCAGGTCACCTGTCTGGATTCTCCCACTTACCCACCTTGCAGGTGCAGGTGAGGATGGTGCACCAGACAGGGTAGCTGTCCCC  
AAAATGTCCCTGTGGCGGAGTGCCTGTCTCCAGTTTGTTTCCCAAGTGTCTGGCGGGAGCCAGGTGACATCAATAAATCTGTGAATGAATGCAGAAATCAGCGGT  
ACTGACTGTACTATATTTGGCTGCCATGATAGGTTCTCACAGCGTCTCATGATCGTAAGGAGATGACATTTCTGTTAGGGAGGGAATGAAAAGGGAGGGAGGG  
ACATCTGAGGGCTTACAGGGCTGCAAGGGGTACAGGGATTGACCCAGGGCAGAACAGGGGAGGGTGTCAAGGAAGAGTGGCTTTAGCAGAGGCACCTTTGGAAGGTGTGA  
GGCATAAATGCTTCTCTTACGTAGGCCAACCTCAAAAATTTTCTAGTAGGAATGTGTCTATGATCAAGTTGTTTCAACACTTTAGACTTAGTAGTAATATGAACCTCACA  
GAAAATTTCTATCCAGCCATATGCTGTGGAGTGAATATTTCTGTTTGTAGAAAAATCTTTAGAGTTTCACTGAGTGTGCTTAAACCAGAAATCTTTGTAAGTATGTGACACTTTT  
CTCACCCTTGTAACTAGTATTTCAAGAGCAGCTAAGGTTTCAAGCTTACAGCTTGTGATGATGGTGTAAATAAATTTAAAGTTTAAAGTTTAAAGTTTAAAGTTTAAAG  
AGATGAACACCCTTCTACACAACCTTCTTGGTACTGGGGGAGGAGAGATCTGACAAATACTGCCATTTCCCTAGGCTGACTGGATTTGAGAACAAATACCCACCCTAT  
TCCACCATGGTATGGTAACTTCTCTGACTTCAAGTTTCAAGTGAATTTCCATGTAATAGGACATTTCCATTAATAACAAGCTGTTTTTACTTTTTTCCCTCCAGGGCCTG  
TGGGATCTGGTCCCGCCTCTCTGGGCTTTCTTACACTACTCTGTACTTACCTTCCCTTCCCTTAGCAGGCACCTTCAACCACCACTCCCTGCTGTGTTTT  
CTCCGCTGGAACCTTTCCCTCTTCCCTCCCAAGATCAATTTCACTCAGCTTGTGACTGAGTTAAGGAGGCTTCTTCCCTGCTGGGTTTCCCTCAGCCCACTCCCTGCTCTCC  
AGGCTGGGGCAGGTTCTTAGTTTGCCTGGAATTTCTGTACTCTTTGTAGCACGTAGTGTGTGGAACCTAAGCCACTAATTTAGTTTCTGGCTCCCTCTGGGGTTGT  
AAGTTTTGTTCATCTAGGGCCGAGTGCATTTCTGGTTACTCTATCCAGTGCAGCCACAGGAGATGTCCAATAAAGTATGTGATGAATGGCTTTAAAAAATAA  
AAA

## Supplementary Note 4: Sequence of TFRC mRNA variant 4 used for probe design, 4695 bp

ACGCACAGCCCCCTGGGGCCGGGGCCGGGGCAGGCTATAAACCGCGGTAGGGGCCCGCATCCCTCAGAGCGTCGGGATATCGGGTGGCGGCTCGGGACGGAGGACG  
CGCTAGTGTCTTCTGTGTGGCAGTTTCAAGATGATGGATCAAGCTAGATCAGCATTTCTTAACCTGGTGTGATGAAAATTCATATGTCCTCGTGGGCTGGATCTCAA  
AAAGATGAAAATCTTGCCTTGTATGTTGAAAATCAATTTCTGTAATTAACCTCAGCAAAAGTCTGGGCTGATCAACATTTTGTAAAGATTCAGGTCAAAGCACAGCGCTCAA  
ACTCGGTGATCATAGTTGATAAGAAGCAGTACTGTTTACCTGGTGGAGAACTCTGGGGTTATGTGGCGTATAGTAAGGCTGCAACAGTACTGGTAACTGGTCCATGC  
TAATTTTGGTACTAAAAAAGATTTTGGAGATTTATACACTCTGTGAATGATTTGATGATGTTCTCAGCAGAGGGAATAAATCACTTTGTCAGAAAAGGTTGCAAAATGCTGAA  
AGCTTAAATGCAATTTGGTGTGTTGATATACATGGACCAGACTAAATTTCCATTTGTTAACGCAGAACTTCTATTTCTTTGGACATGCTCATCTGGGGACAGGTGACCCTTACA  
CACCTGGATTCCCTTCAATCACACTCAGTTTCCACCATCTCGGTCAATCAGGATTTGCCAATAATACCTGTCCAGACAATCTCCAGAGCTGCTGCAGAAAAGCTGTTTTGG  
GAAATGGAAGGAGACTGTCCCTGACTGAAAACAGACTACATGTAGGATGGTAACCTCAGAAAAGCAAGATGTGAAGTCACTGTGAGCAATGTGCTGAAAAGGATA  
AAAATTTCAACATCTTTGGAGTTATTAAGGCTTTGTAGAACAGACTCACATGTTGTAGTTGGGGCCAGAGAGATGCAATGGGGCTGGAGCTGCAAAAATCCGGTGTAG  
GCACAGCTCTCTTATGAACTTGCAGAGATTTCTCAGATATGGTCTTAAAGATGGGTTTACGCCAGCAGAGAAGCATTATCTTTGGCAGTTGGAGTGTGGAGACTTTGG  
ATCGGTTGGTGCCACTGAAATGGCTAGAGGGATACCTTTCGTCCTGCAATTTAAAGGCTTTCACTTATATTAATCTGGATAAAGCGGTTCTTTGGTACCAGCACTTCAAGGTT  
CTFCGCGACTGTTGTATACGCTTTTGTAGAAAACAATGCAAAAAGTGAAGCATTCCGTTACTGGGCAATTTCTATATAGCAGCACTCAATGAAATGAAATGAAATGAAATGAA  
AACTACTTTAGCAATGCTGCTTTCCCTTTCTGCTATTTGGAATCCAGCAGTTTCTTTCTGTTTTTGGCAGGACACAGATTTATCTTTATTTGGGTACCACCATGGA  
CACCTATAGGAAGTATGAGAGGATTTCTGAGTTGAACAAAGTGGCACAGCAGCTGCAGAGGTCGCTGGTTCAGTTCTGTATTAACCTAACCCATGATGTTGAATTTGAA  
CTGGAGCTATGAGAGGTACAACAGCAACTGCTTTTCAATTTGTGAGGGATCTGAACCAATACAGAGCAGACATAAAGGAAATGGGCTGAGTTTACAGTGGCTGTATTTCTGCTC  
GTGGAGACTTCTTCCTGCTACTTTCCAGACTAACAGATTTTCGGGAATGTCAGGAAACAGACAGATTTGTCATGAAAGAACTCAATGATGCTGATGAGTGAAGTGA  
TCACTTCTCTCTCCCTACGTATCTCCAAAAGAGTCTCTTTCCGACATGTCTTTGGGGTCCGGCTCTCACACGCTGCCAGCTTTACTGGAGAACTTGAAGTGCGTAAA  
CAAAAATAACGGTCTTTTAAATGAACGCTGTTTCAAGAACAGTGGTCTAGCTACTTTGGACTATTCAGGGAGCTGCAAAATGCCTCTCTGGTGCAGTTTGGGACATTTGACA  
ATGAGTTTTAAATGTGATACCCATAGCTTCCATGAGAACAGCAGGAGTGTCTGGTTTCTAGACTTGTGCTGATCGTCTAAATTTTCAAGTGGGCTACAAAACCTGATGTTA  
AAATTTCCATCCATCTTGGTACTACTAGATGCTTTAGGACAGCAGCTTTTAAATACAGGGTAGATAAACCTTCAAGTTAAAGTGAATAAACCTTAAAAAATAAGCTC  
ATGATGGAATATTTCCCTATCTCTAGAATTTTAAAGTCTTTGTAATGGGAACGCTCTTTCTGTTGTTGTTAATGAAAATGTGAGAAACAGTATGTAATGATCTCTC  
TGAATCTAAGGGCTGGTCTCTGCTGAAGGTTGTAAGTGGTCCCTTACTTTGAGTGTCTCCAACTTCAATTTGATGCTAAATAGGAGATACAGGTTGAAAGACCTTCTCC  
AAATGAGATCTAAGCCTTTCCATAAGGAATGTAGTGGTTTCTTCTTCTGAAAAGAAACAGTAACTTTCAGAAGAGATGGGCTGTGTTTTCTGCAATGAGGCTTGAAT  
GGAGGCTCTTCTGGATAAAAATGAGGTTCAACTGTTGATTTGCAAGGAATAAGGCCCTTAAATATGTTAACTTCAAGTTTAAAGTGAATAAACCTTAAAAAATAAGGACT  
TAGTATAATTTCTTTCTCTGTCCCTTCCCCATAAGCCTCCATTTAGTCTTTGTTATTTTTGTTTTCTCCAAAGCACATTTGAAGAGAACAGTTCAGGTGTTTGTAGTT  
GCAGACTCAGTTTGTGACAGTTTAAAGAAATAATGCTGCCAAATTTGGCCAAAGTGTAACTTGGGGAGAGCTTTCTGTCTTTTGGCAGTGAAGATTTATTTGTTA  
TTTACTCAGTGACAGATTTCACTATAAATGGTGTTTTTTAAATAGAATAATAATTCGAAGCAGTGCCTTCCATAATATGACAGTTAATGCTGCTGTTTTTAAATAA  
AGCAGACTCTGCTAATAAAACCAACAGATACTGGAAGTTTTGTCATTTATGGTCAACACTTAAGGTTTTAGAAAACAGCCGTCAGCCAAATGTAAATGAAATAAGTTGAAG  
CTAAGATTTAGAGATGAATTAATTTAATAGGGGTTGCTAAGAAGCAGCAGTGCAGAGATAAAGATGCTGGTTTTCTTAATGCAAGTGAATTTGTGACCAAGTTATAAATC  
AATGTCACCTTAAAGGCTGTGGTGTACTCTGCAAAATTTTATAGCTCAGTTTATCCAAAGTGTAACTTCAATTTCCATTTTGCAAAATTTCCAGTACTTTGTCAACATC  
TAACACATTTATCGGGAGAGTGTCTTCCATAAATTTCTTTCATGCAATGACATCTTCAAAGCTTGAAGATCGTTAGTATCTAACATGATCTCCAACTCTATAATTTCCCTATC  
TAAGTAATTTATCGGGAACAGTGTTTCCATAAATTTCTTTCATGCAATGACATCTTCAAAGCTTGAAGATCGTTAGTATCTAACATGATCTCCAACTCTATAATTTCCCTATC  
TTTTAGTTTTAGTTTGCAGAAACATTTTGTGGTCAATTAAGTGTGGGTTGGGTAATTAACCACTGTAATAAATGAAATGAAATGAAATGAAATGAAATGAAATGAAATGAA  
ACCTTTATGGTTTCTCCAGGCTCTACTTAAATGAGATAGTAGATACATATTTAATAGTTTGTGCTATTTGCAAGTCAATTTTAACTTTATCAGATTTATTTGCTACTCTCT  
ATAAATTTAGTTCGGAGAGTGTCTTCAATCCAGAATTTGACTTTTGCATTTAAAGCAGGGACTTTTGTATGAAAGGTTTTGGGGGTTTGGGGGTTTGGGGGTTTGGGGGTTT  
GACAGCTCTGCCATCCATTCGTTGGTGTCAATTTAAATGTAGGTATGAATAAGTTCGAAGCTCCGTGAGTGAACCATCAATTAACAGTGTATGATCAGCTGTTTGTCAATAGG  
GCAGTTGCAACGGCCCTTATGGGAAAAGTTTCAATAGGCTCTCTTCCAGTCTTCTAGTGTACTTACCTGATTTACAGCTTCAATGATGTTGCTACTCAGCTCTCTTT  
AATCTTCAAGTTTATCTTTTACTTCTCTTTTATCTTTGACTGACATTTAGCTAGTCAAGTGAAGGCTATAGCTGAGATTTCCGTTTGGGTTTACGCACAGTACTT  
AAATGAAAGTATGTCGATGTTCACTGTAACAACAATTAACACAGGGCAGTGCATTTGCAAGGAGTGTCTTCCAGAAAACCTTTTCTACAGTTAGGTTAGTGTACT  
TTCTATCAAGCCAGTACGTGCTAACAGGCTCAATTTCTGAAATGAAATATCAGACTAGTGACAGCTCTGGTCTTGTGATGCTTCTCTGTTAAGGAGATGGGCTTTTG

GAGGTAAAGGATAAAATGAATGAGTTCTGTCATGATTCACTATTCTAGAACTTGCATGACCTTACTGTGTTAGCTCTTTGAATGTTCTTGAATTTTAGACTTCTTTGTA  
AACAAATGATATGTCCCTATCATTTGTATAAAAAGCTGTATGTGCAACAGTGTGGAGATTCCCTGTCTGATTTAATAAAAATACTTAAACACTGAAAAAAAAA

## Supplementary References

1. Hoops, S.; Sahle, S.; Gauges, R.; Lee, C.; Pahle, J.; Simus, N.; Singhal, M.; Xu, L.; Mendes, P.; Kummer, U., COPASI--a COMplex PATHway Simulator. *Bioinformatics* **2006**, *22* (24), 3067-74.
2. Jungmann, R.; Avendano, M. S.; Dai, M.; Woehrstein, J. B.; Agasti, S. S.; Feiger, Z.; Rodal, A.; Yin, P., Quantitative super-resolution imaging with qPAINT. *Nat Methods* **2016**, *13* (5), 439-42.
3. Schnitzbauer, J.; Strauss, M. T.; Schlichthaerle, T.; Schueder, F.; Jungmann, R., Super-resolution microscopy with DNA-PAINT. *Nat Protoc* **2017**, *12*, 1198-1228.
4. Stahl, E.; Martin, T. G.; Praetorius, F.; Dietz, H., Facile and scalable preparation of pure and dense DNA origami solutions. *Angew Chem Int Ed Engl* **2014**, *53* (47), 12735-40.
5. Agasti, S. S.; Wang, Y.; Schueder, F.; Sukumar, A.; Jungmann, R.; Yin, P., DNA-barcoded labeling probes for highly multiplexed Exchange-PAINT imaging. *Chem Sci* **2017**, *8* (4), 3080-3091.
6. Campello, R. J. G. B.; Moulavi, D.; Sander, J. In *Density-Based Clustering Based on Hierarchical Density Estimates*, Berlin, Heidelberg, Springer Berlin Heidelberg: Berlin, Heidelberg, 2013; pp 160-172.
7. Rothmund, P. W. K., Folding DNA to create nanoscale shapes and patterns. *Nature* **2006**, *440* (7082), 297-302.
8. Schueder, F.; Strauss, M. T.; Hoerl, D.; Schnitzbauer, J.; Schlichthaerle, T.; Strauss, S.; Yin, P.; Harz, H.; Leonhardt, H.; Jungmann, R., Universal Super-Resolution Multiplexing by DNA Exchange. *Angew Chem Int Ed Engl* **2017**, *56* (14), 4052-4055.
